# Supplementary material for: LFA-1 activation enriches tumor-specific T cells in a cold tumor model and synergizes with CTLA-4 blockade
Source: JCI journal article supplement (doi:10.1172/jci154152), 2022-05-12
Supplement: sd1 [file 1]

## **LFA-1 activation enriches tumor-specific T cells in a cold tumor model and synergizes with CTLA-4 blockade**

Amber Hickman<sup>1</sup>, Joost Koetsier<sup>1</sup>, Trevin Kurtanich<sup>1</sup>, Michael Nielsen<sup>1</sup>, Glenn Winn<sup>1</sup>, Yunfei Wang<sup>1,2</sup>, Salah-Eddine Bentebibel<sup>1</sup>, Leilei Shi<sup>1</sup>, Simone Punt<sup>1</sup>, Leila Williams<sup>1</sup>, Cara Haymaker<sup>3</sup>, Charles B. Chesson<sup>1</sup>, Faisal Fa'ak<sup>1</sup>, Ana Dominguez<sup>1,2</sup>, Richard Jones<sup>4</sup>, Isere Kuitse<sup>4</sup>, Amy R. Caivano<sup>5</sup>, Sayadeth Khounlo<sup>5</sup>, Navin D. Warier<sup>5</sup>, Upendra Marathi<sup>6</sup>, Robert V. Market<sup>5</sup>, Ronald J. Biediger<sup>5</sup>, John W. Craft, Jr.<sup>7</sup>, Patrick Hwu<sup>1,2</sup>, Michael A. Davies<sup>1</sup>, Darren G. Woodside<sup>5</sup>, Peter Vanderslice<sup>5</sup>, Adi Diab<sup>1</sup>, Willem W. Overwijk<sup>1,8</sup>, and Yared Hailemichael<sup>1,9,\*</sup>

<sup>1</sup>Department of Melanoma Medical Oncology, The University of Texas MD Anderson Cancer Center, Houston, Texas, USA. <sup>2</sup> Present address Moffitt Cancer Center, Tampa, Florida, USA.

<sup>3</sup>Department of Translational Molecular Pathology, The University of Texas MD Anderson Cancer Center, Houston, Texas, USA. <sup>4</sup>Department of Lymphoma Myeloma, The University of Texas MD Anderson Cancer Center Houston, Texas, USA. <sup>5</sup>Molecular Cardiology Research Laboratories, Texas Heart Institute, Houston, Texas, USA. <sup>6</sup>7 Hills Pharma, Houston, Texas, USA. <sup>7</sup>Department of Biology and Chemistry, University of Houston, Texas, USA. <sup>8</sup>Present address Nektar Therapeutics, San Francisco, California, USA.

<sup>9</sup>Lead Contact

\*Correspondence:

Yared Hailemichael

Melanoma Medical Oncology

The UT MD Anderson Cancer Center

7455 Fannin Street, Unit 0904

Houston, Texas, 77054, USA

Ph# (713) 792-1931

[yhailemi@mdanderson.org](mailto:yhailemi@mdanderson.org)

## **Supplemental Material**

1. Supplemental Figures (1 - 16)
2. Supplemental Methods
3. Supplemental Table 1
4. Supplemental Table 2

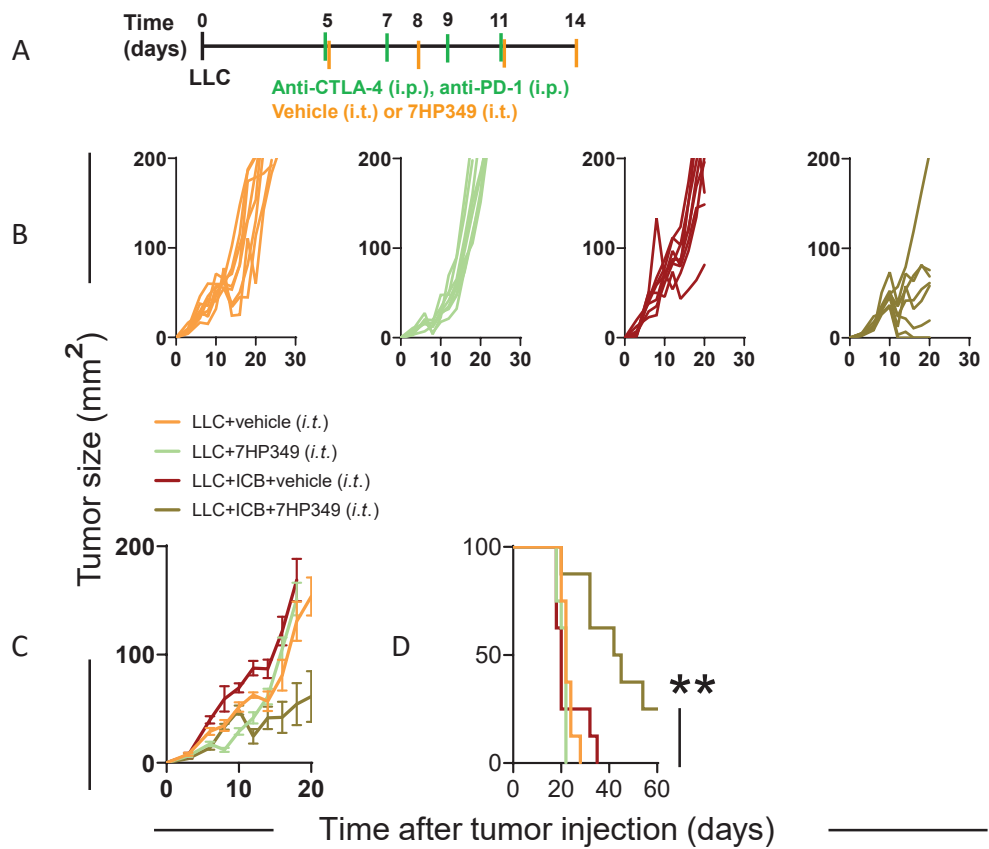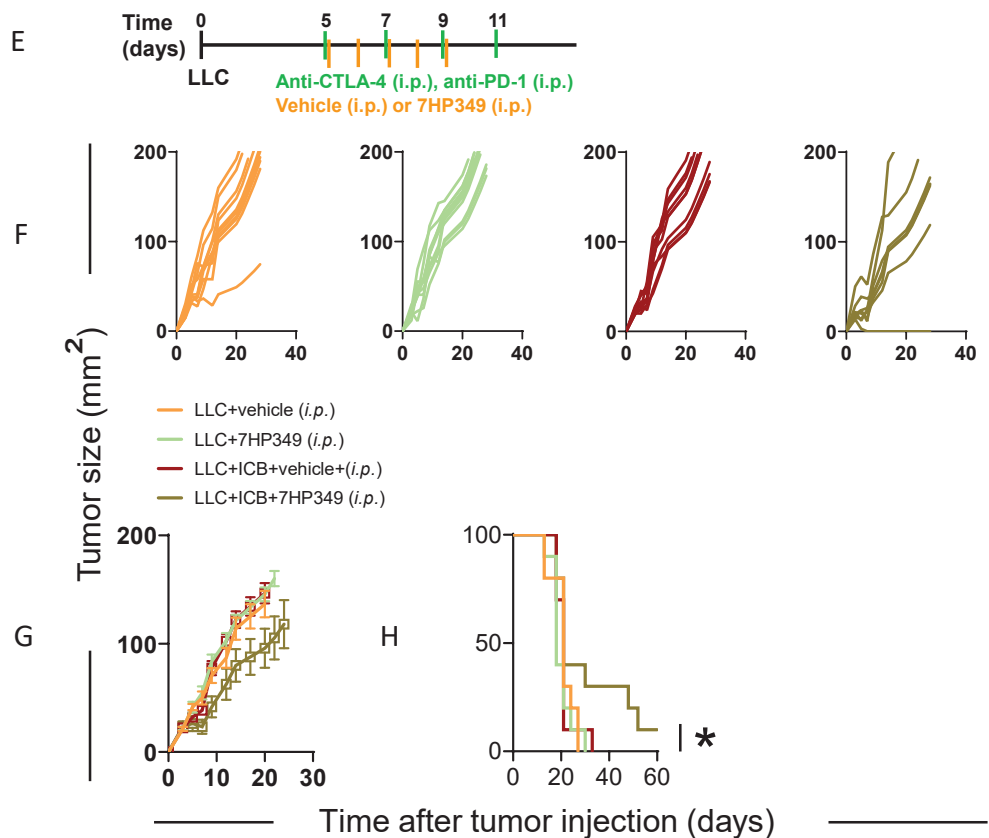

**Supplemental Figure 1. 7HP349 therapy overcomes primary resistance to combination checkpoint blockade.**

(A-D) C57BL/6 mice received anti-CTLA-4 (i.p.) and anti-PD-1 (i.p.) 5 days after LLC tumor injection and/or vehicle intratumorally (i.t.) or 7HP349 (i.t.) 2 weeks (2 x weekly) after tumor injection, as indicated: (A) Treatment scheme, (B) Tumor growth curves (C) Average tumor burden (mean  $\pm$  SEM,  $n = 10$ ,  $*P < 0.05$ ,  $**P < 0.01$  one-way ANOVA), and Kaplan-Meier survival curve ( $n = 8$ )  $**P < 0.001$  log-rank test.

(E-H) Mice were treated as in 'A' and but with systemic intraperitoneal dosing of 7HP349 or vehicle 5 days after tumor injection 1 week (5 x weekly): (E) experimental scheme, (F) individual tumor burden plots, (G) (mean  $\pm$  SEM.,  $n = 10$ ,  $*P < 0.05$ , one-way ANOVA), and (H) Kaplan-Meier survival curve ( $n = 8$ )  $*P < 0.05$  log-rank test.



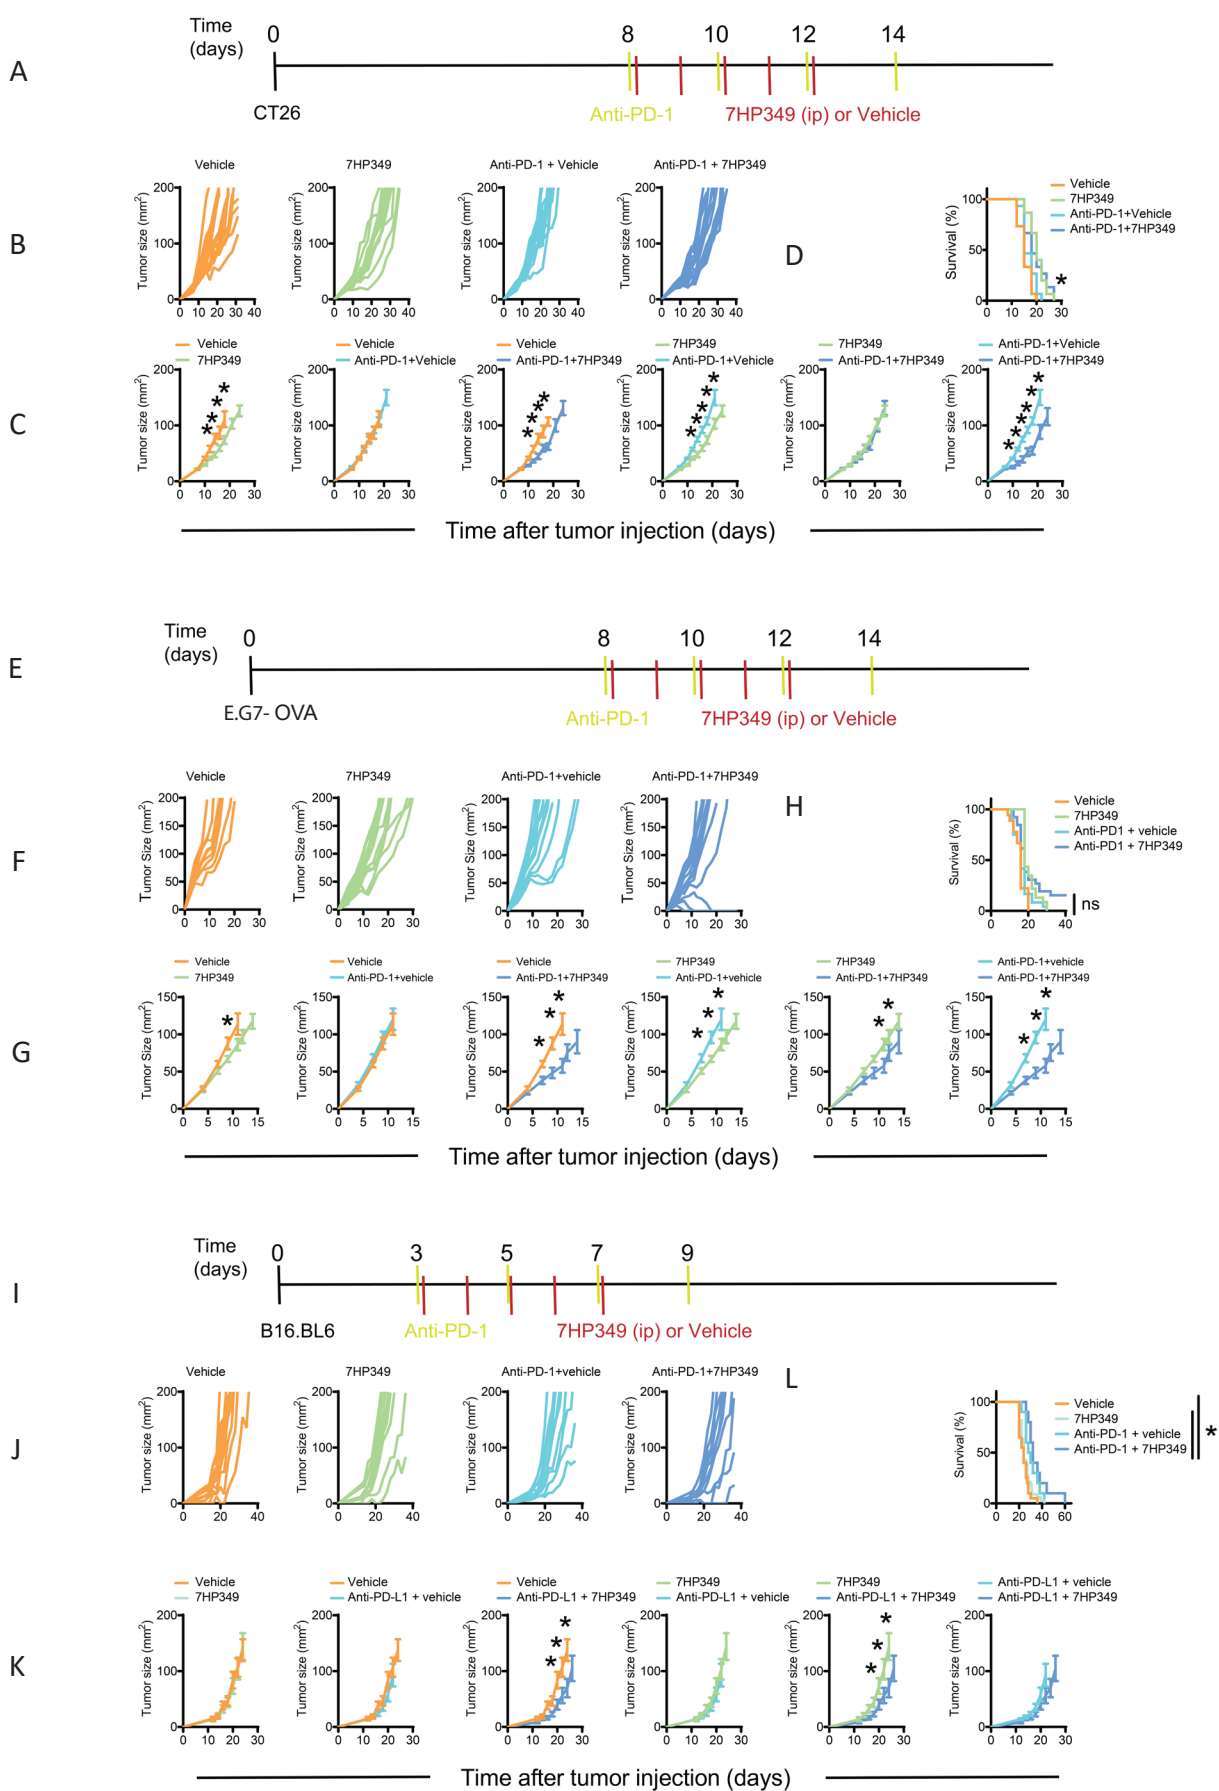

**Supplemental Figure 2. 7HP349 therapy overcomes primary resistance to PD-1 checkpoint blockade.**

(A-D) Balb/c mice 8 days after subcutaneous injection with CT26 cells received 7HP349 or vehicle intraperitoneally (i.p.), at days 8, 9, 10, 11 and 12 with anti-PD-1 at days 8, 10, 12 and 14. Tumors were harvested 21 days after injection. (A) Treatment scheme. (B-D) Tumor burden measurement with anti-PD-1 (B) Tumor growth curves (C) Average tumor burden (mean  $\pm$  SEM,  $n = 10$ ) one-way ANOVA, Tukey test.  $*P < 0.05$ . (D) Kaplan-Meier survival curve ( $n = 10$ ),  $*p < 0.05$  log-rank test.

(E-H) C57BL/6 mice 8 days after s.c. injection with E.G-OVA 7 cells received 7HP349 or vehicle intraperitoneally (i.p.) at days 8, 9, 10, 11 and 12 with anti-PD-1 (i.p.) at days 8, 10, 12 and 14. (E) Treatment scheme. (F) Tumor growth curves (G) Average tumor burden (mean  $\pm$  SEM,  $n = 10$ ) one-way ANOVA, Tukey test.  $*P < 0.05$ . (H) Kaplan-Meier survival curve ( $n = 10$ ),  $*P < 0.05$ , log-rank test.

(I-L) C57BL/6 mice 3 days after s.c. injection with B16.BL6 cells received 7HP349 or vehicle intraperitoneally (i.p.), at days 3, 4, 5, 6 and 7 with anti-PD-1 (i.p.) at days 3, 5, 7 and 9 (I) Experimental scheme. Tumor burden measurement (J) Tumor growth curves (K) mean  $\pm$  SEM ( $n = 10$ ) one-way ANOVA, Tukey test.  $*P < 0.05$ . (L) Kaplan-Meier survival curve ( $n = 10$ ),  $*P < 0.05$ , log-rank test.

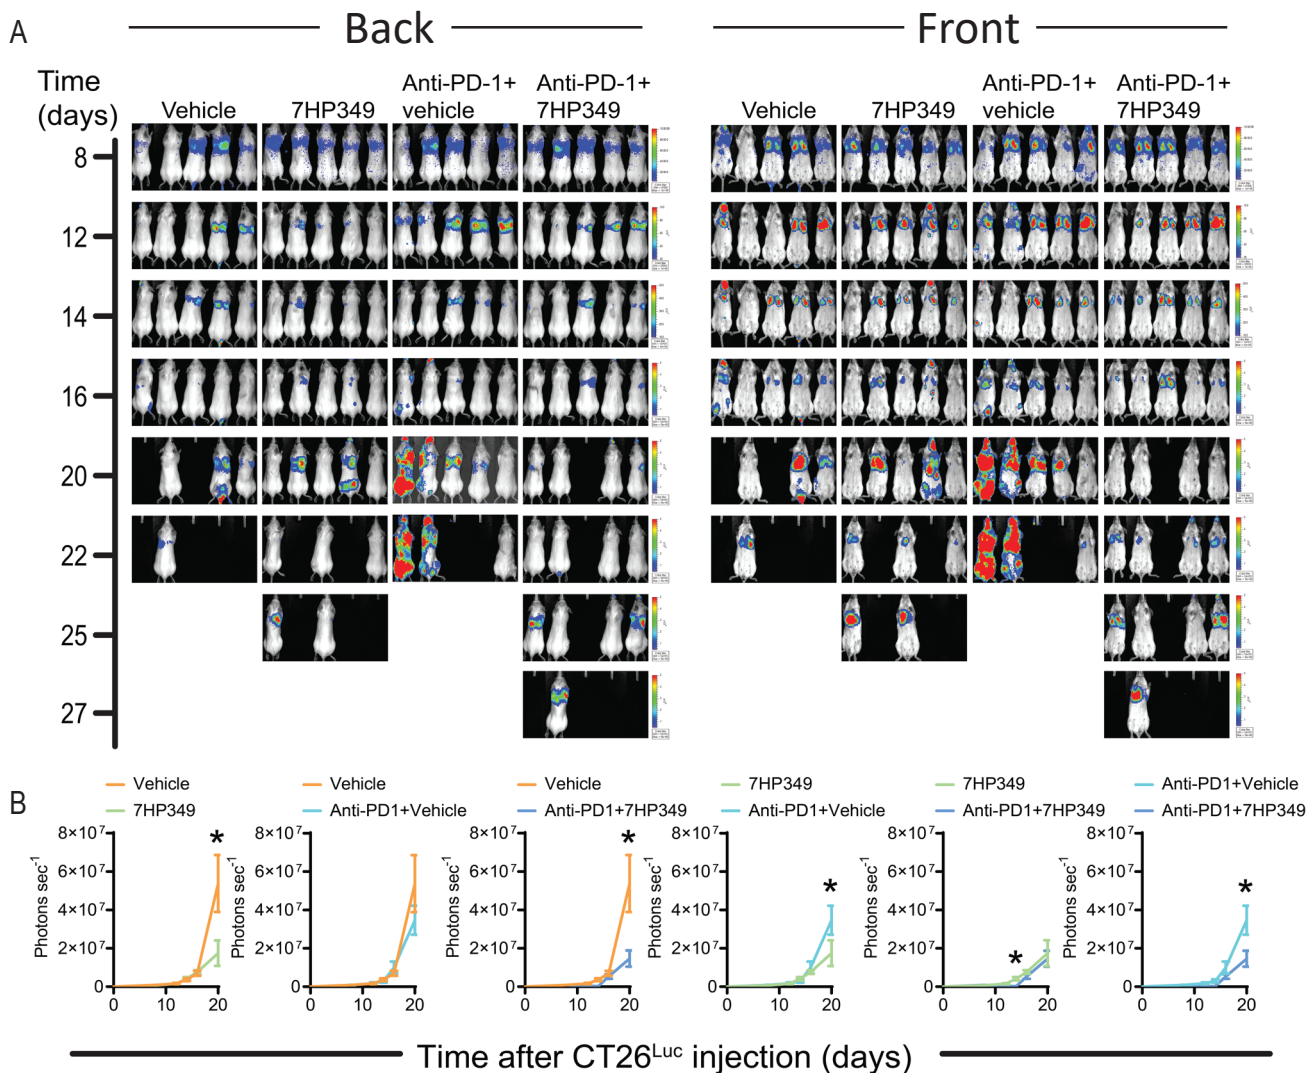

**Supplemental Figure 3. 7HP349 therapy overcomes primary resistance to PD-1 blockade in pulmonary metastatic tumor model.**

(A, B) Balb/c mice received  $1 \times 10^6$  luciferase-expressing CT26 cells i.v. Mice received vehicle, 7HP349, anti-PD-1, or the combination at the indicated timepoints, as in (A). Luciferase-expressing CT26 cells were visualized by whole body imaging at the indicated time points. (B) Line plots represent means  $\pm$  SEM. photons /second ( $\text{S}^{-1}$ ) ( $n=5$ ,  $*P < 0.05$ , unpaired t test).

A

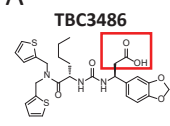

$\alpha 4\beta 1$   $IC_{50}$  =  $0.009 \pm 0.0002$   $\mu M$   
 $\alpha L\beta 2$   $IC_{50}$  =  $46 \pm 5.8$   $\mu M$

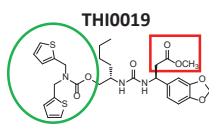

$\alpha 4\beta 1$   $EC_{50}$  =  $33 \pm 1.6$   $\mu M$   
 $\alpha L\beta 2$   $EC_{50}$  =  $20 \pm 4.9$   $\mu M$

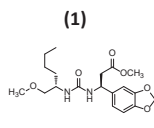

Inactive

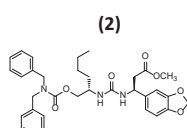

$\alpha 4\beta 1$   $EC_{50}$  =  $31 \pm 7.5$   $\mu M$   
 $\alpha L\beta 2$   $EC_{50}$  =  $17 \pm 0.8$   $\mu M$

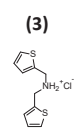

Inactive

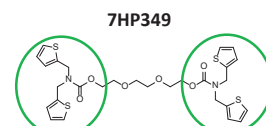

$\alpha 4\beta 1$   $EC_{50}$  =  $11 \pm 0.5$   $\mu M$   
 $\alpha L\beta 2$   $EC_{50}$  =  $11 \pm 1.6$   $\mu M$

B

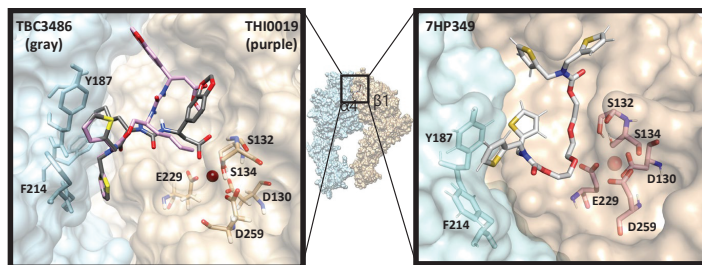

C

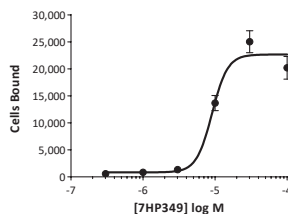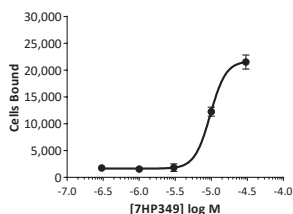

D

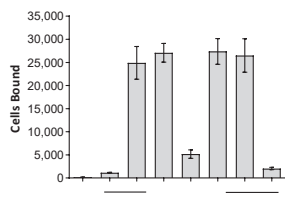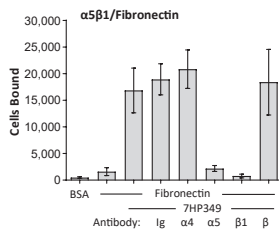

E

| Integrin            | Ligand      | $EC_{50}$ ( $\mu M$ ) |
|---------------------|-------------|-----------------------|
| $\alpha 4\beta 1$   | VCAM-1      | $11 \pm 0.5$          |
| $\alpha L\beta 2$   | ICAM-1      | $11 \pm 1.6$          |
| $\alpha 4\beta 7$   | MAdCAM-1    | $10 \pm 2.1$          |
| $\alpha 5\beta 1$   | Fibronectin | $7.7 \pm 2.3$         |
| $\alpha 1\beta 1$   | Collagen IV | not active            |
| $\alpha 2\beta 1$   | Collagen I  | not active            |
| $\alpha V\beta 3$   | Vitronectin | not active            |
| $\alpha IIb\beta 3$ | Fibrinogen  | not active            |

F

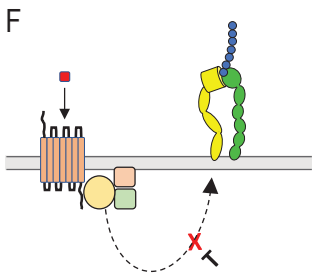

G

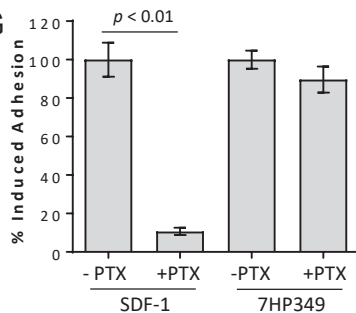

H

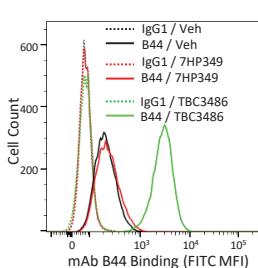

| LIBS mAb | Treatment | MFI (IgG)    | MFI (mAb)         |
|----------|-----------|--------------|-------------------|
| B44      | Veh       | $87 \pm 7.8$ | $330 \pm 82$      |
|          | 7HP349    | $104 \pm 13$ | $326 \pm 92^{ns}$ |
|          | TBC3486   | $96 \pm 8.1$ | $2448 \pm 280^*$  |
| HUTS-21  | Veh       | $89 \pm 10$  | $294 \pm 87$      |
|          | 7HP349    | $95 \pm 15$  | $201 \pm 49^{ns}$ |
|          | TBC3486   | $89 \pm 14$  | $2112 \pm 492^*$  |
| 9EG7     | Veh       | $70 \pm 2.2$ | $294 \pm 58$      |
|          | 7HP349    | $72 \pm 2.7$ | $215 \pm 22^{ns}$ |
|          | TBC3486   | $72 \pm 3.0$ | $722 \pm 85^*$    |

I

| Species (cell line) | $EC_{50}$ ( $\mu M$ ) |
|---------------------|-----------------------|
| Human (Jurkat)      | $2.0 \pm 0.8$         |
| Mouse (70Z/3)       | $2.0 \pm 0.8$         |
| Rat (RBL1)          | $2.6 \pm 0.8$         |
| Dog (DH82)          | $2.0 \pm 0.1$         |

#### **Supplemental Figure 4. Integrin activator 7HP349.**

(A) Compound structures.

(B) Molecular docking of integrin activators into a model of integrin  $\alpha 4 \beta 1$ .

(C) K562 cells expressing integrin  $\alpha 4 \beta 7$  adhesion to plastic immobilized MAdCAM-1.

(D) K562 cell adhesion to plastic immobilized fibronectin.

(E) 7HP349 selectivity and EC<sub>50</sub>'s of 7HP349 against various integrin targets (mean  $\pm$  s.d.,  $n = 3$ ).

(F,G) 7HP349 induced cell adhesion is not sensitive to Pertussis Toxin (PTX) treatment

(F) Cartoon schematic of GPCR signaling (G) Jurkat cell adhesion to immobilized  $\alpha 4 \beta 1$  ligand CS-1 (mean  $\pm$  s.d.,  $n = 3$ ).

(H) 7HP349 cross-species activity against integrin  $\alpha 4 \beta 1$  (mean  $\pm$  s.d.,  $n = 3$ ).

(I) 7HP349 does not induce exposure of  $\beta 1$  integrin LIBS epitopes (mean fluorescence intensity (MFI)  $\pm$  SEM,  $n = 3$ ,  $^{**}P < 0.01$ ).

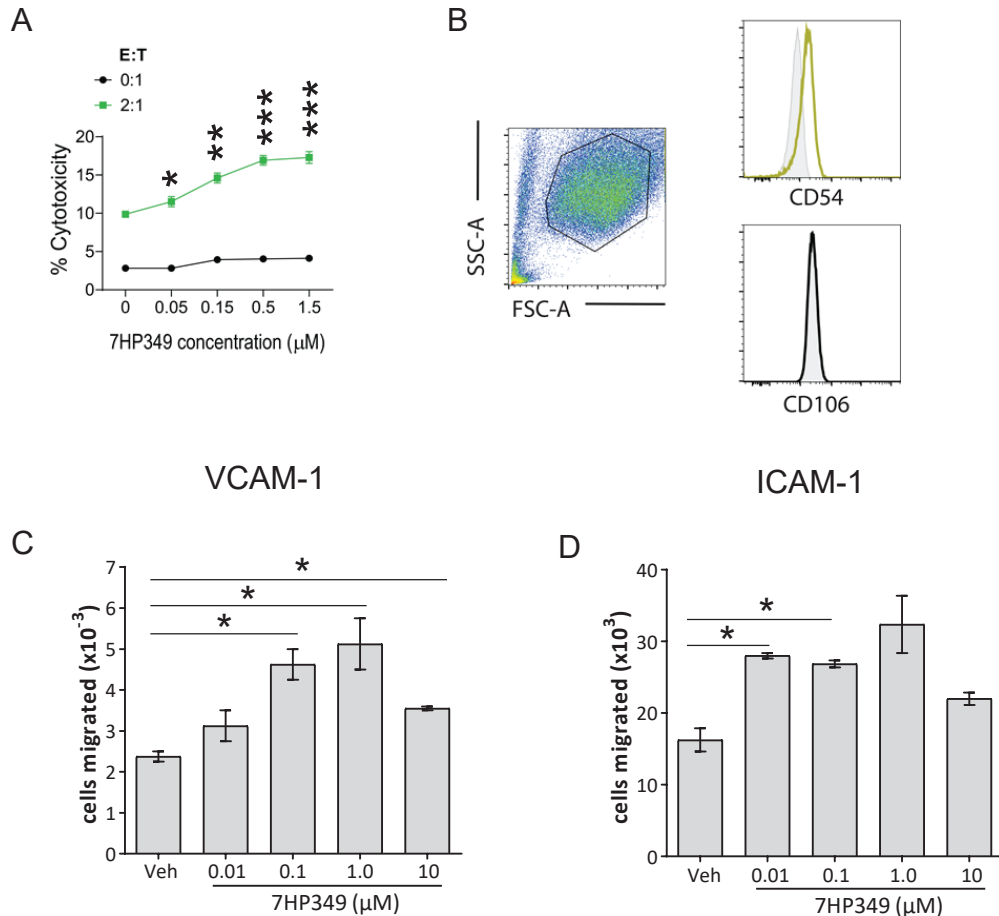

### Supplemental Figure 5. 7HP349 enhances cytolytic activity and cell migration.

(A) Effector T cells (TIL) from patient derived melanoma cell lines were incubated with HLA-matched target tumor cell line 2767 at the indicated effector / target (E/T) ratios and 7HP349 dose concentrations for 3 hours. Cell death, as determined by caspase-3–positive cells (means  $\pm$  SEM,  $n = 3$ , \*  $P \leq 0.05$ ; \*\*  $P \leq 0.01$ , \*\*\*  $P \leq 0.001$ , unpaired two-tailed t test).

(B) Flow cytometer analysis showing ICAM-1 (CD54) and VCAM-1 (CD106) expressions on 2767 tumor cell line.

(C,D) 7HP349 dose-dependent enhancement of Jurkat cell CXCL12 dependent chemotaxis on  $\alpha 4\beta 1$  and  $\alpha L\beta 2$  ligands (D) VCAM-1 (mean  $\pm$  s.d.,  $n = 3$ , \*  $P \leq 0.05$ ; Tukey test) (E) ICAM-1 (means  $\pm$  s.d.,  $n = 3$ , \*  $P \leq 0.05$ ; Tukey test).

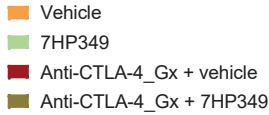

A

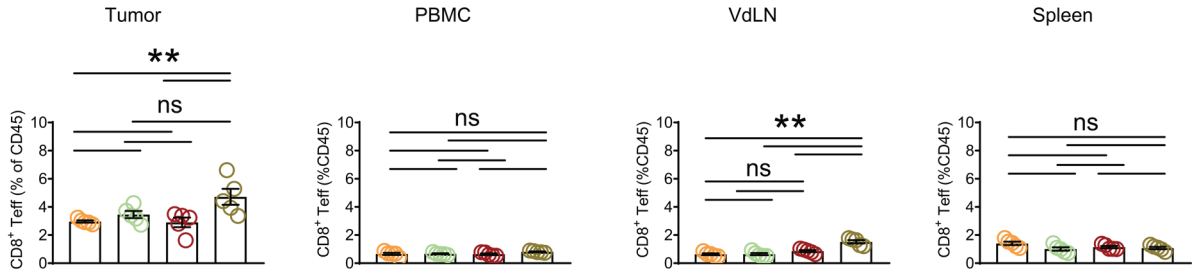

B

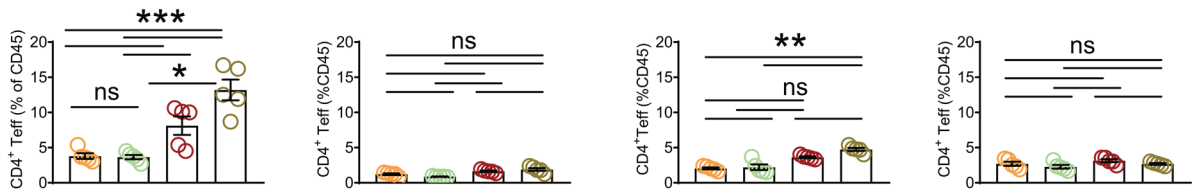

### Supplemental Figure 6. 7HP349 treatment enhances T cell localization to tumor.

C57BL/6 mice 3 days after s.c.injection with B16.BL6 cells received 7HP349 or vehicle intraperitoneally (i.p.), at days 3, 4, 5, 6 and 7 with GVAX intradermally (i.d.) and anti-CTLA-4 intraperitoneally (i.p.) at days 3, 6 and 9. Tumors were harvested on d 21.

(A) CD8<sup>+</sup> Teff level (% of CD45) in tumor, PBMC, VdLN and Spleen means  $\pm$ s.e.m. ( $n = 5$ , \* $p < 0.05$ , one-way ANOVA).

(B) CD4<sup>+</sup> Teff level (% of CD45) in tumor, PBMC, VdLN and Spleen means  $\pm$ s.e.m. ( $n = 5$ , \* $P < 0.05$ , one-way ANOVA).

## A Spleen

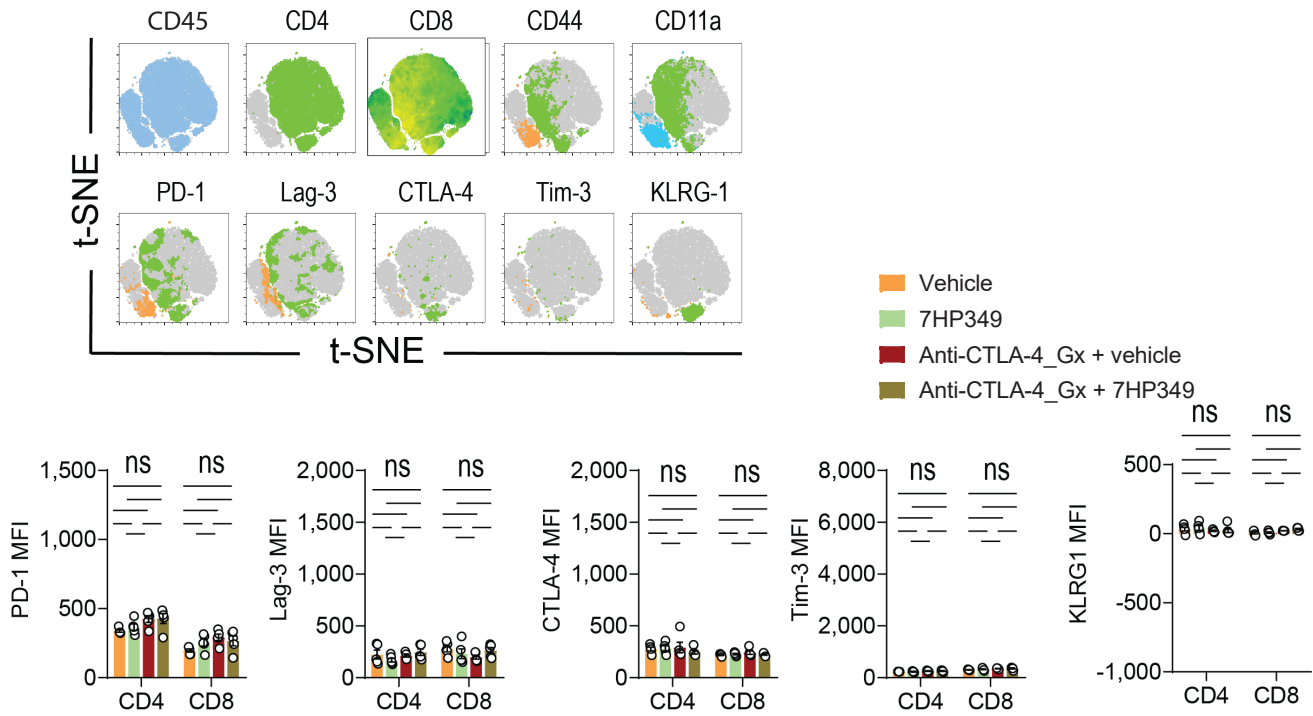

## B Tumor

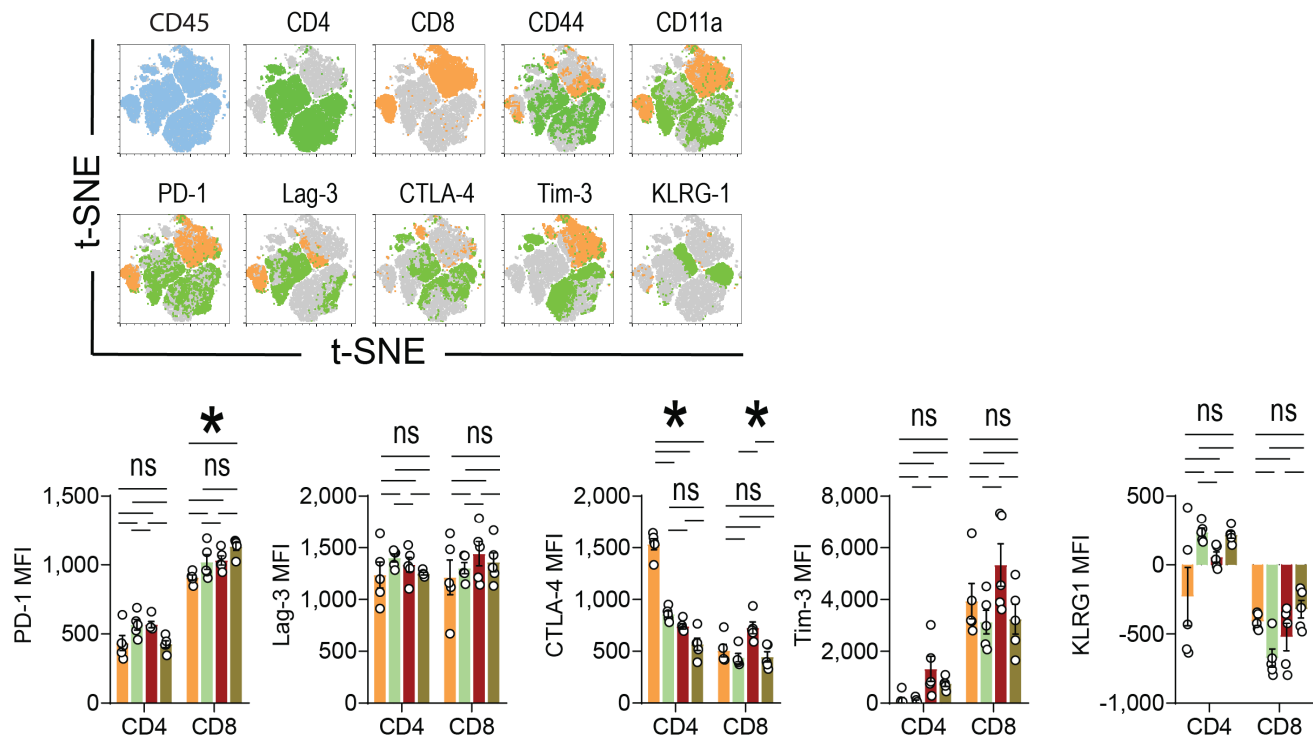



**Supplemental Figure 7. Activation markers expression on spleen and tumor infiltrating CD8<sup>+</sup> and CD4<sup>+</sup> T effectors.**

C57BL/6 mice 3 days after s.c.injection with 3×10<sup>4</sup>B16.BL6 cells received 7HP349 or vehicle intraperitoneally(i.p.), at days 3, 4, 5, 6 and 7 with GVAX intradermally(i.d.) and anti-CTLA-4 intraperitoneally(i.p.) at days 3, 6 and 9. Spleen and tumor tissues were harvested at d 21. t-SNE dimension reduction plots comparing activation marker expression on CD4<sup>+</sup> and CD8<sup>+</sup> T cells in (A) spleen (mean ± SEM, *n* = 5) (B) tumor (mean ± SEM, *n* = 5, \**P* < 0.05, one-way ANOVA, Tukey test).

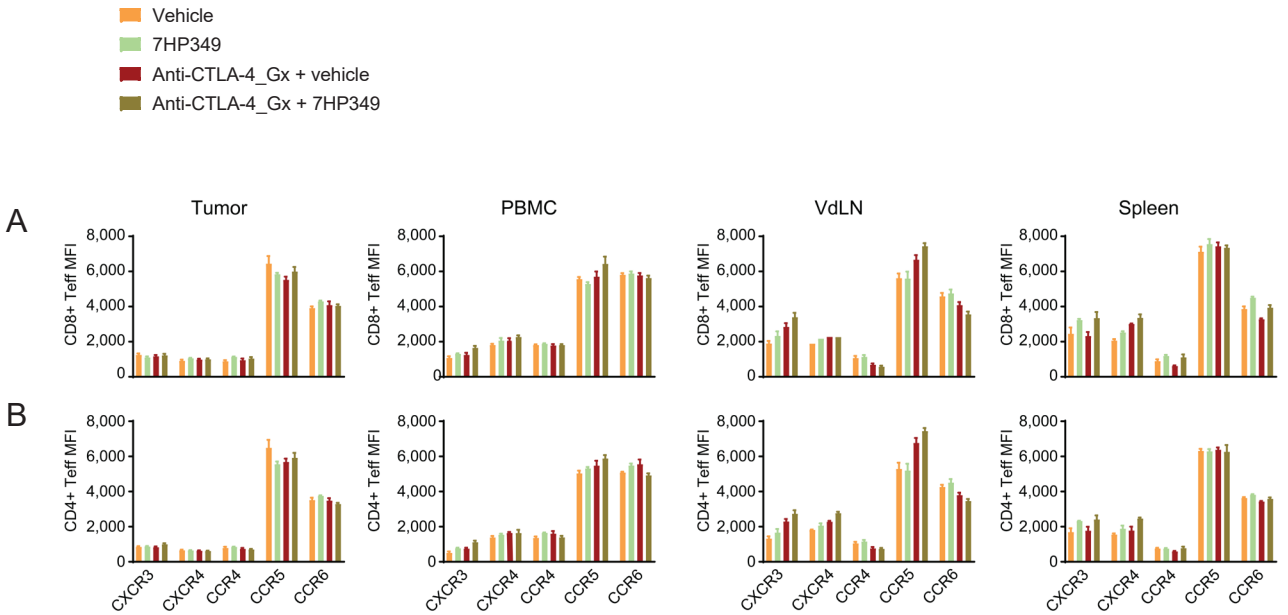

### Supplemental Figure 8. CD8<sup>+</sup> and CD4<sup>+</sup> Teff chemokine receptor expression.

C57BL/6 mice 3 days after s.c.injection with B16.BL6 cells received 7HP349 or vehicle intraperitoneally (i.p.), at days 3, 4, 5, 6 and 7 with GVAX intradermally (i.d.) and anti-CTLA-4 intraperitoneally(i.p.) at days 3, 6 and 9. Tumors were harvested on d 21.

(A) CD8<sup>+</sup> Teff chemokine receptor expression (MFI) in tumor, PBMC, VdLN and spleen mean  $\pm$  SEM. ( $n = 5$ ).

(B) CD4<sup>+</sup> Teff chemokine receptor expression (MFI) in tumor, PBMC, VdLN and spleen means  $\pm$  SEM ( $n = 5$ ).

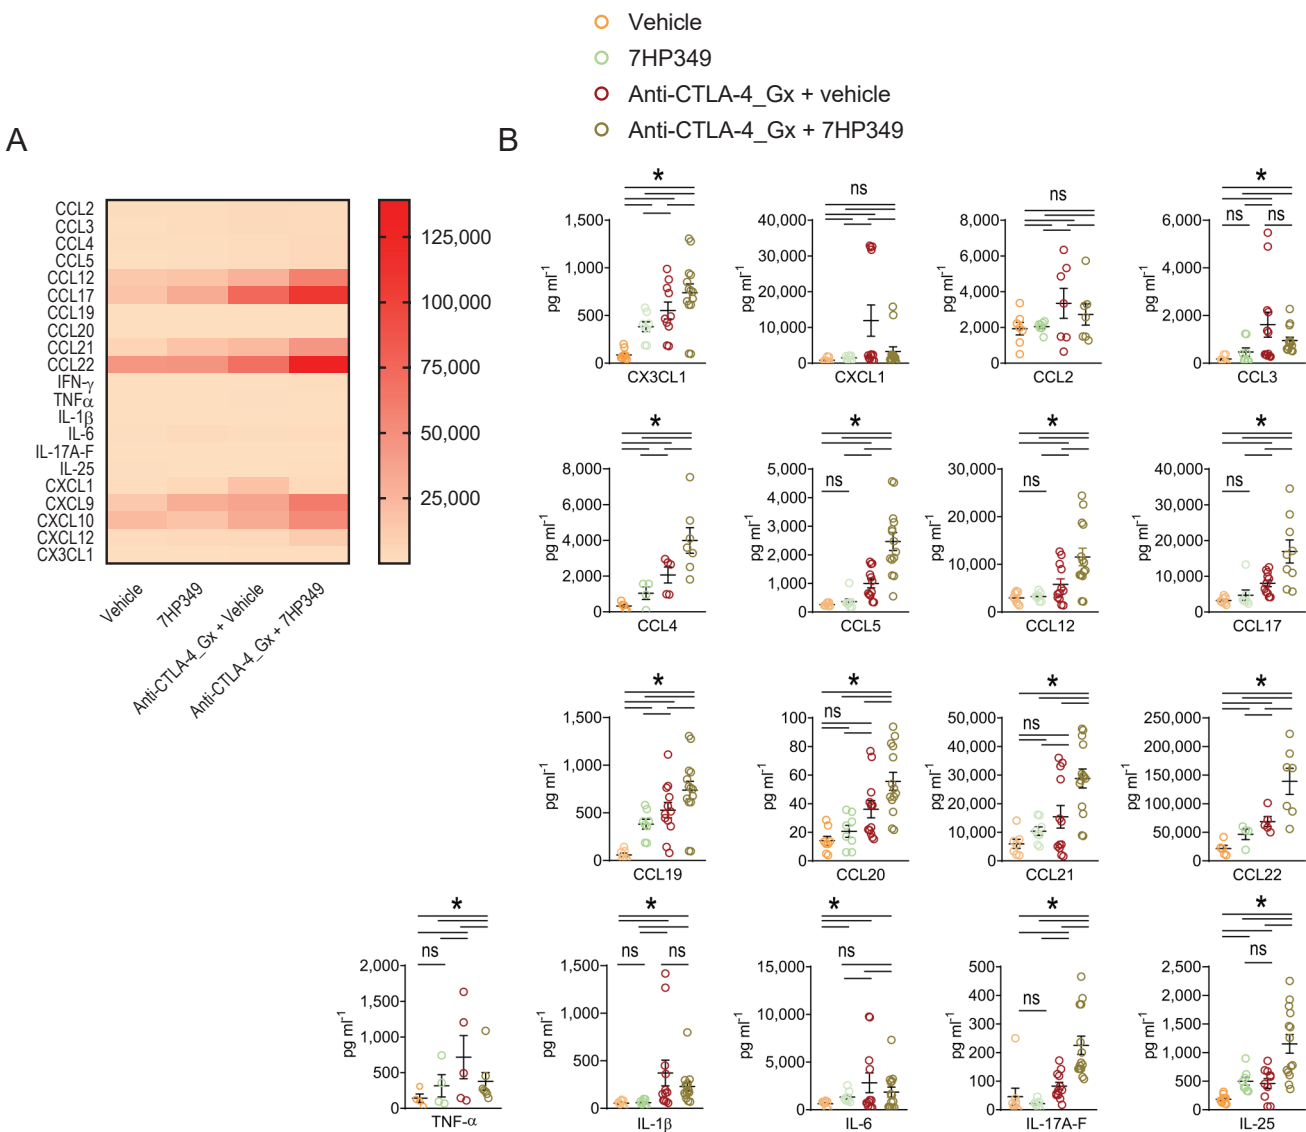

### Supplemental Figure. 9. Proinflammatory cytokine expression in tumor.

C57BL/6 mice 3 days after s.c.injection with  $3 \times 10^4$  B16.BL6 cells received 7HP349 or vehicle intraperitoneally(i.p.), at days 3, 4, 5, 6 and 7 with GVAX intradermally(i.d.) and anti-CTLA-4 intraperitoneally(i.p.) at days 3, 6, and 9. Tumors were harvested on d 21. (A) Heat map displaying normalized cytokine and chemokine expression across treatment groups (B) concentration (means  $\pm$ s.e.m.,  $n = 5$ ,  $*P < 0.05$ , one-way ANOVA).

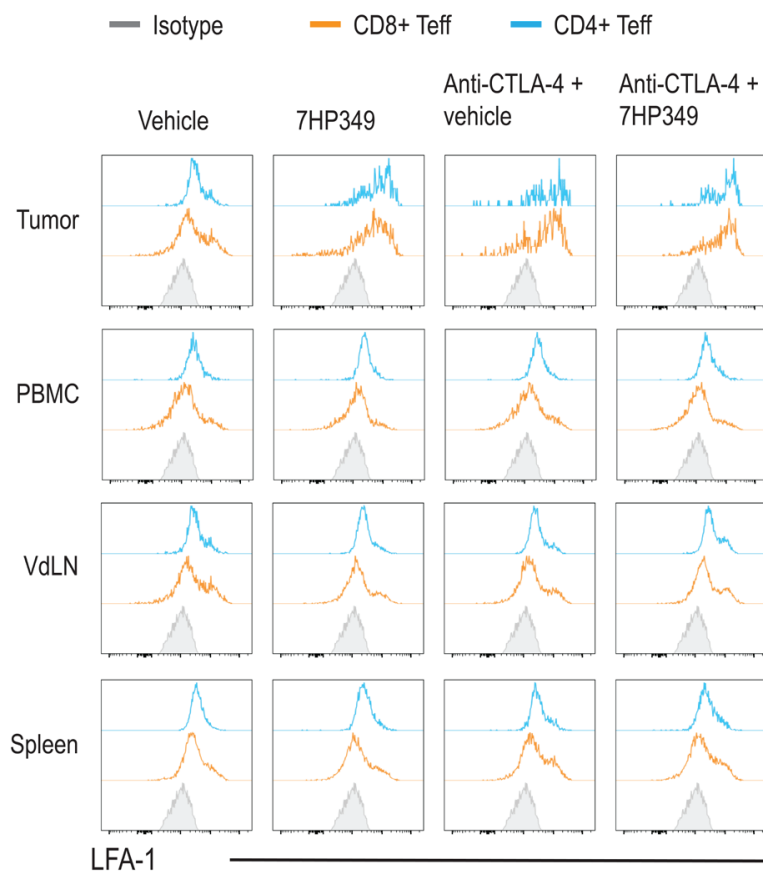

**Supplemental Figure 10. Flow cytometer histogram panels showing LFA-1 expression on CD4<sup>+</sup> and CD8<sup>+</sup> Teff from tumor, PBMC, lymph node and spleen.**

A

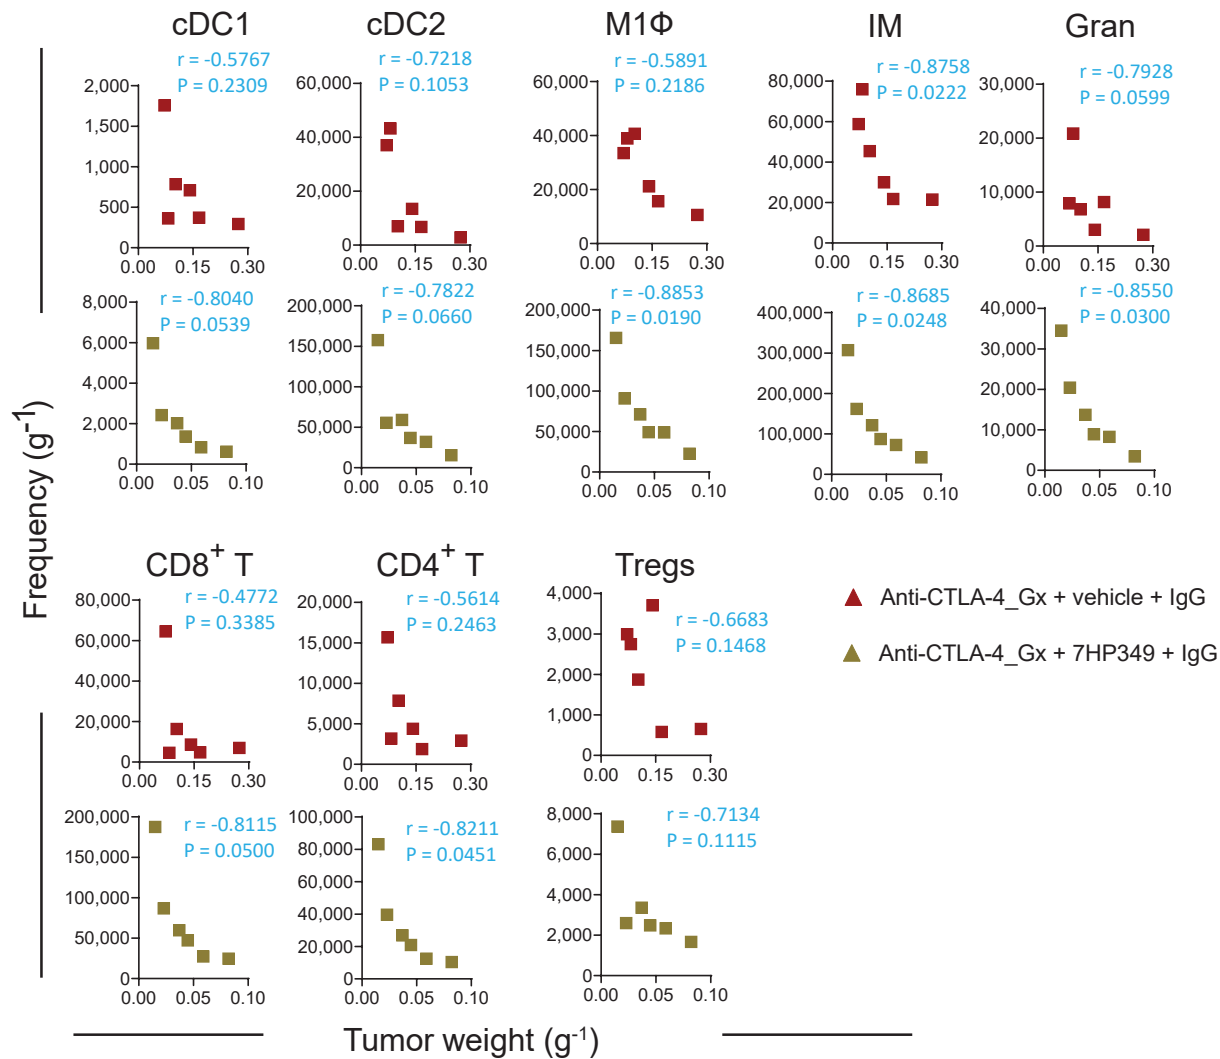

B

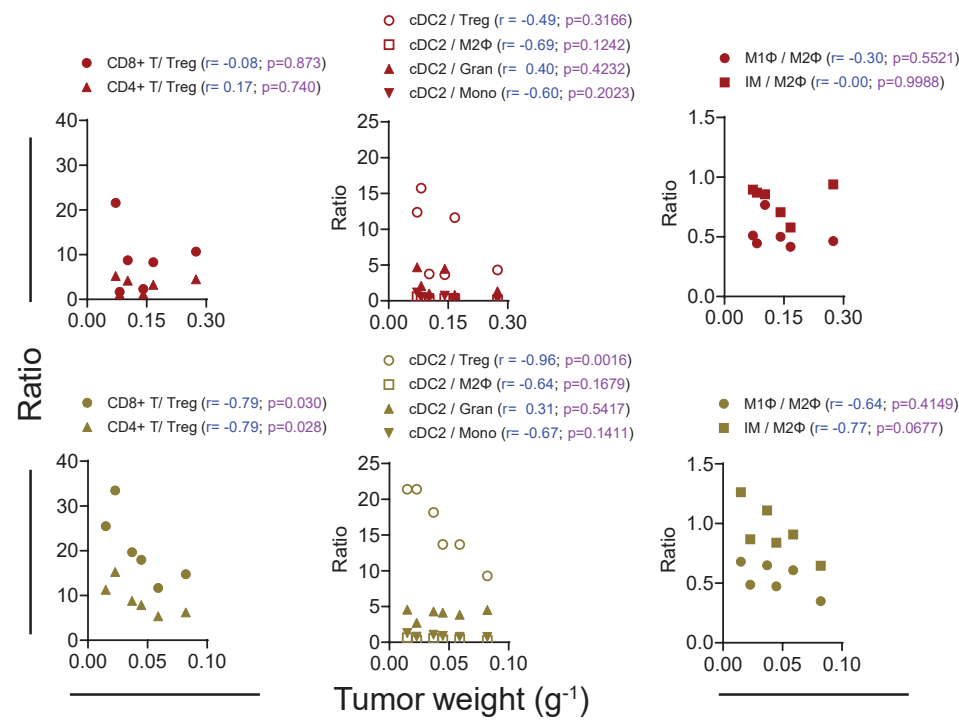

**Supplemental Figure 11. Correlation analysis between tumor weight and immune cell infiltrates.**

C57BL/6 mice 3 days after s.c.injection with BL6 cells received 7HP349 or vehicle intraperitoneally (i.p.), at days 3, 4, 5, 6 and 7 with GVAX intradermally(i.d.) and anti-CTLA-4 intraperitoneally (i.p.) at days 3, 6, and 9. Tumors were harvested on d 21. Correlation analysis between tumor weight and (A) myeloid cell frequency ( $\text{g}^{-1}$ ) (B) immune cell ratios.

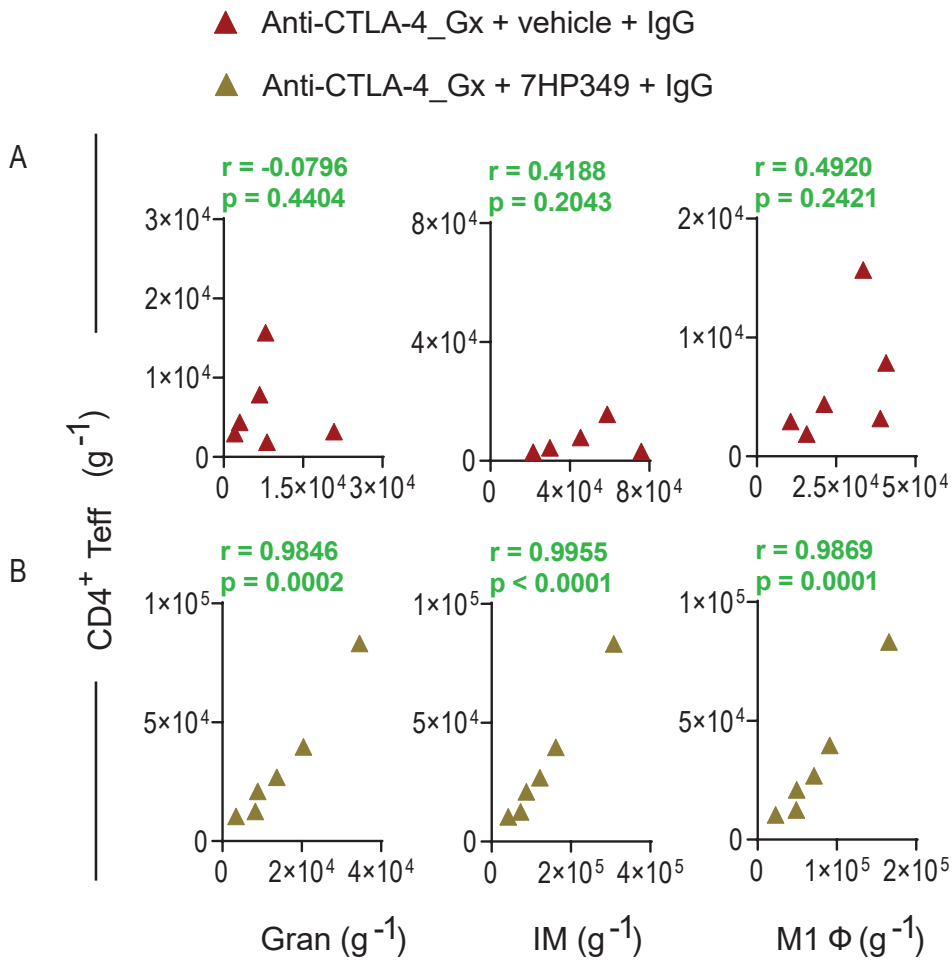

**Supplemental Figure 12. Correlation analysis between myeloid and CD4<sup>+</sup> B16 tumor immune cell infiltrates.**

Mice bearing 3-day s.c.B16.BL6 melanomas received GVAX intradermally(i.d.) and anti-CTLA-4 (i.p.) at days 3, 6, and 9 and vehicle or 7HP349 at days 3, 4, 5, 6, and 7.

Correlation analysis of granulocytes, IM, or M1 $\Phi$  versus CD4<sup>+</sup> Teff from tumors of mice treated with (A) vehicle (B) 7HP349.

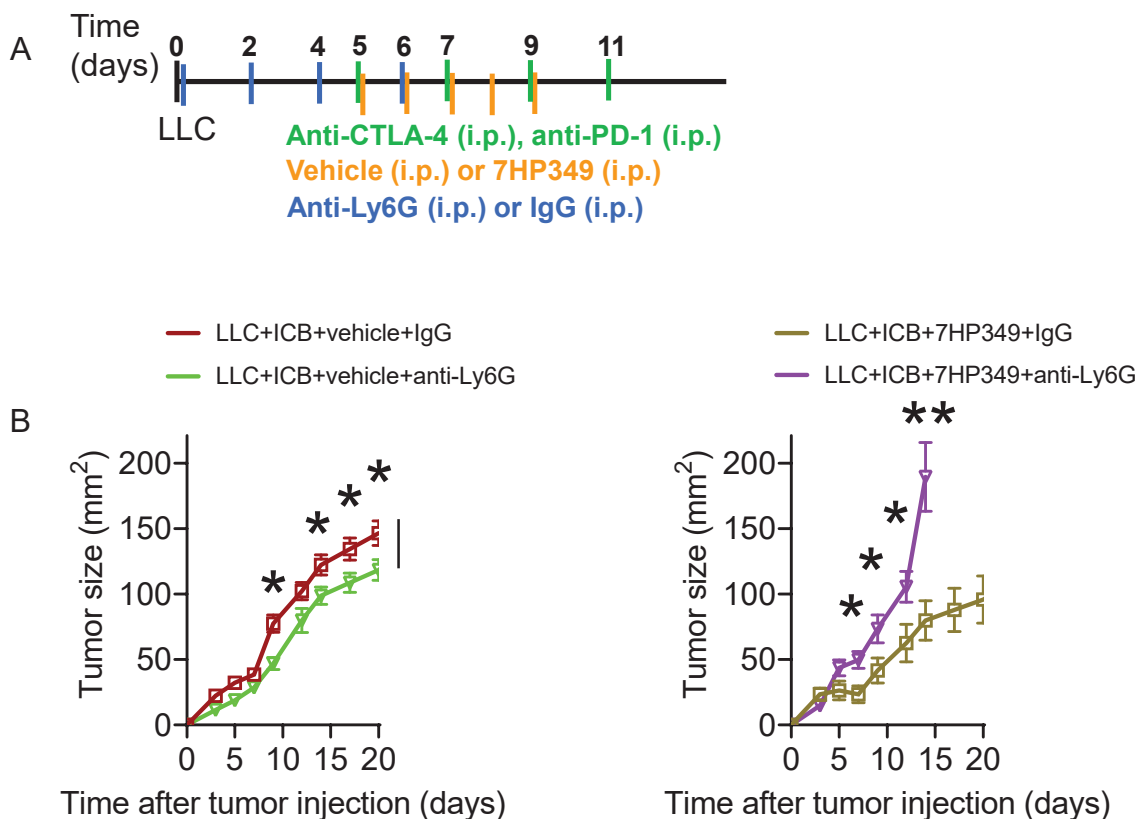

**Supplemental Figure 13. 7HP349 antitumor effect is dependent on neutrophils.**

C57BL/6 mice injected with LLC tumor were treated with anti-CTLA-4, anti-PD-1 (ICB), 7HP349 and/or vehicle and anti-Ly6G or IgG, as indicated.

(A) Treatment scheme. (B) Average tumor burden in mice ( $n = 10$ ). Data are represented as mean  $\pm$  SEM, one-way ANOVA, Tukey test, \*  $P < 0.05$ , \*\*  $P < 0.01$ .



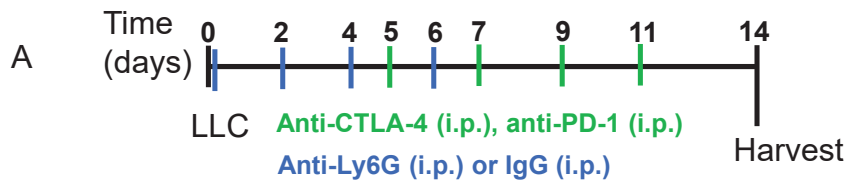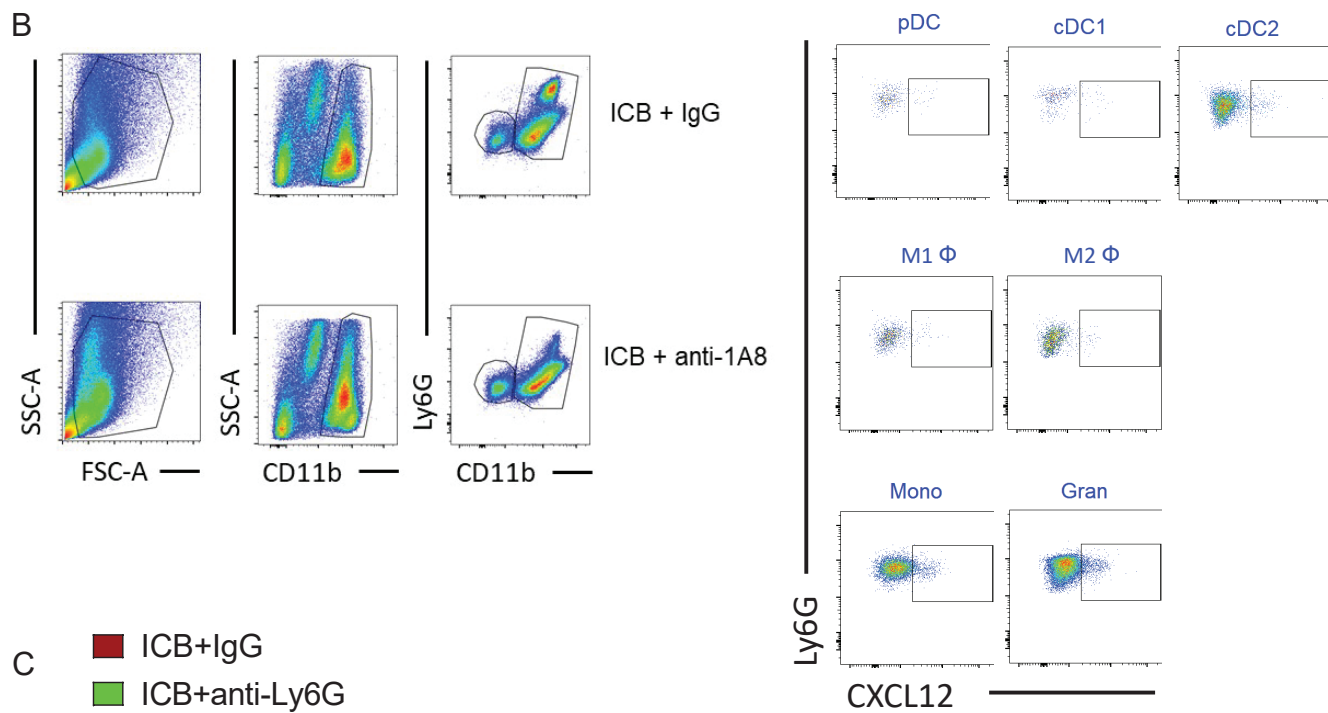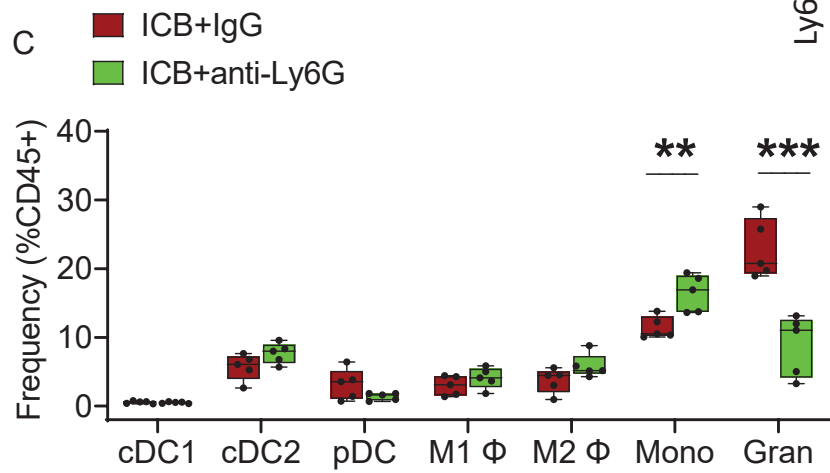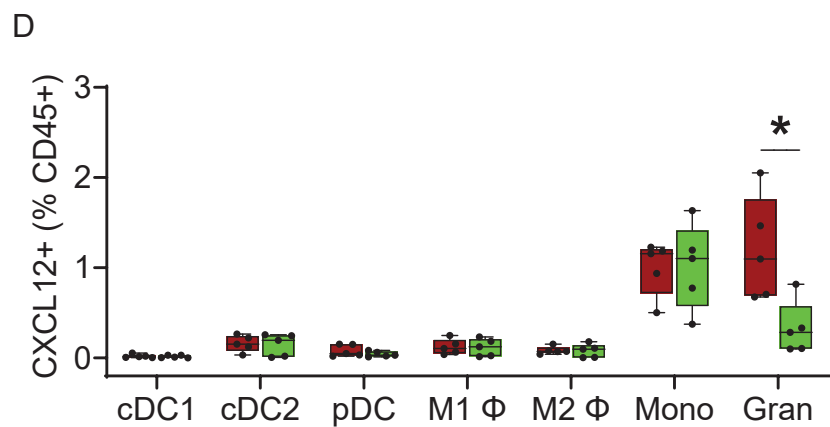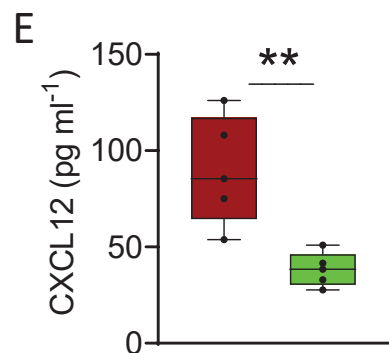

#### **Supplemental Figure 14. Neutrophils are main source of CXCL12 at the TME.**

C57BL/6 mice received anti-CTLA-4 (i.p.) and anti-PD-1 (i.p.) 5 days after LLC tumor injection and IgG (i.p.) or anti-Ly6G (i.p.). Tumors were harvested 14 days after injection. (A) Experimental scheme (B) Flow cytometry analysis showing CXCL12 secretion by myeloid cell populations in tumor (C-E) Combination of box-and-whisker and dot plots showing (C) the total cDC1, cDC2, pDC, M1, M2, monocytes and granulocytes as percentage of CD45<sup>+</sup> leukocytes. (D) CXCL12<sup>+</sup> cDC1, cDC2, pDC, M1 macrophage, M2 macrophage, monocytes and granulocytes as percentage of CD45<sup>+</sup> leukocytes. (E) CXCL12 concentration in tumor supernatant analyzed by ELISA. Data are represented as (mean  $\pm$  SEM,  $n = 5$ ). The whiskers are the minimum and maximum values, the lower and upper box edges the 25th and 75th percentage values, respectively, and the lines within the boxes the median. Data were analyzed using unpaired t test. \* $P < 0.05$ , \*\* $P < 0.01$ , \*\*\* $P < 0.001$ .

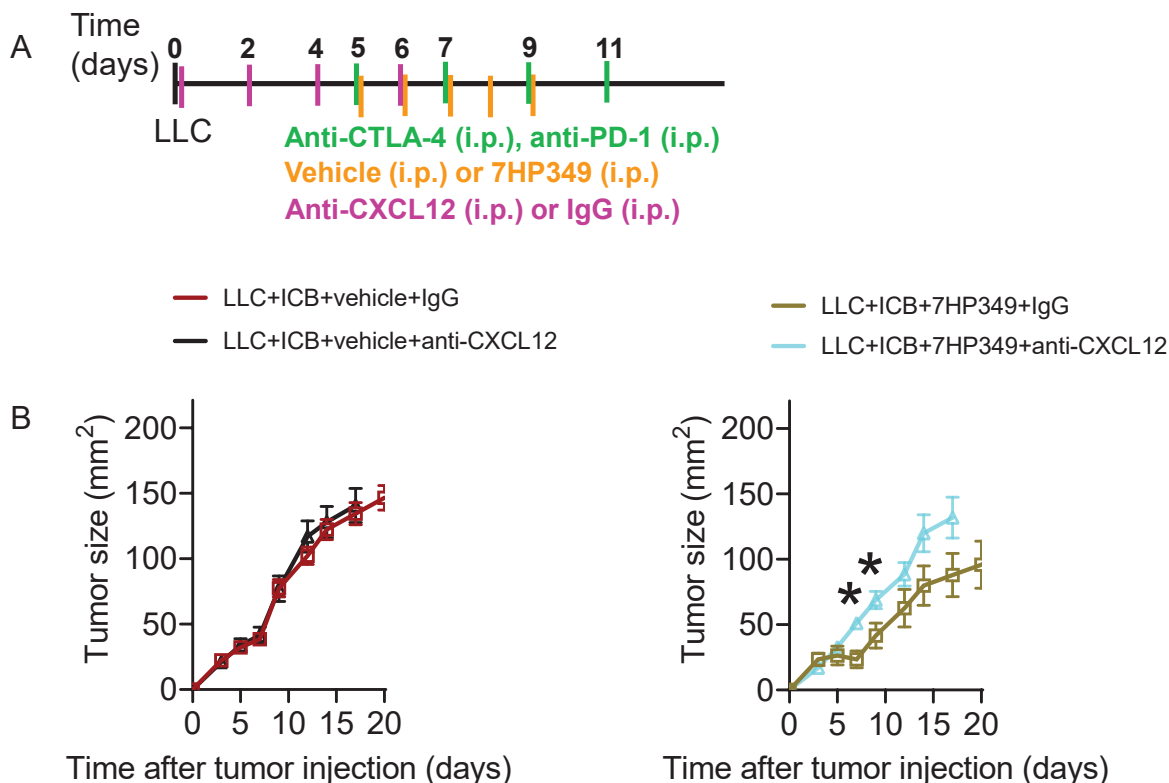

**Supplemental Figure 15. 7HP349 antitumor effect is dependent on CXCL12.**

C57BL/6 mice injected with LLC tumor were treated with anti-CTLA-4, anti-PD-1 (ICB), 7HP349 and/or vehicle and anti-CXCL12 or IgG, as indicated.

(A) Treatment scheme. (B) Average tumor burden in mice ( $n = 10$ ). Data are represented as mean  $\pm$  SEM, one-way ANOVA, Tukey test, \*\*  $P < 0.01$ .

CXCL12

CXCL12 at baseline

CXCR4

CXCR4 at baseline

A

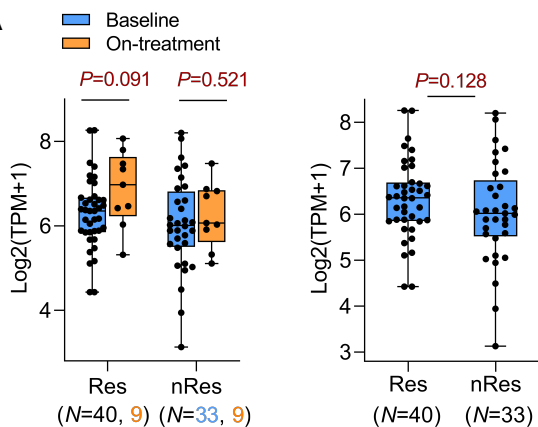

B

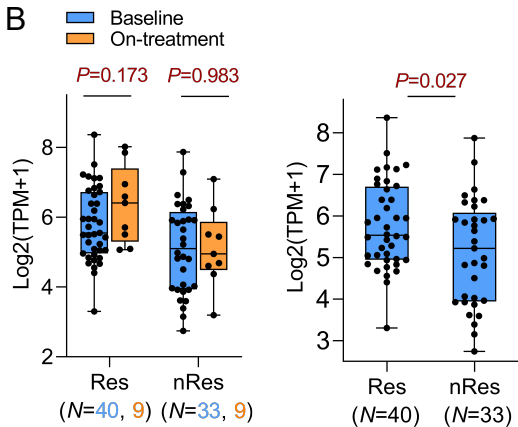

S100A12

S100A12 at baseline

CD1C

CD1C at baseline

C

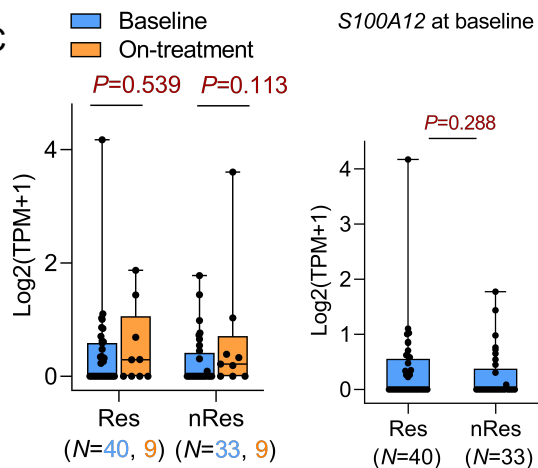

D

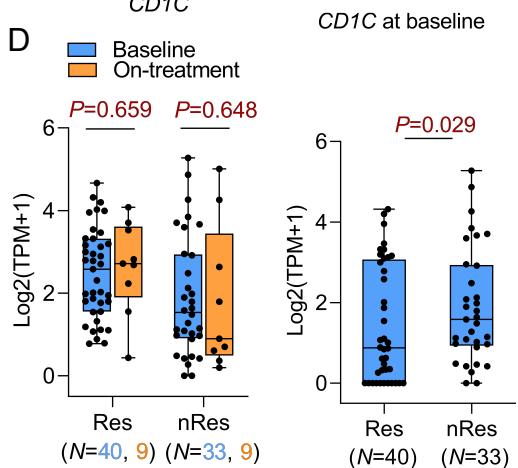

CD8A

CD8A at baseline

CD8B

CD8B at baseline

E

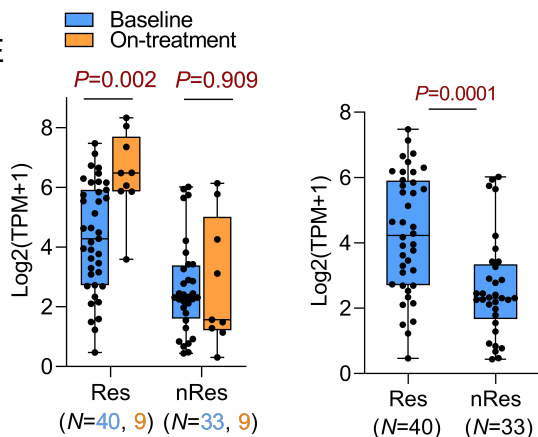

F

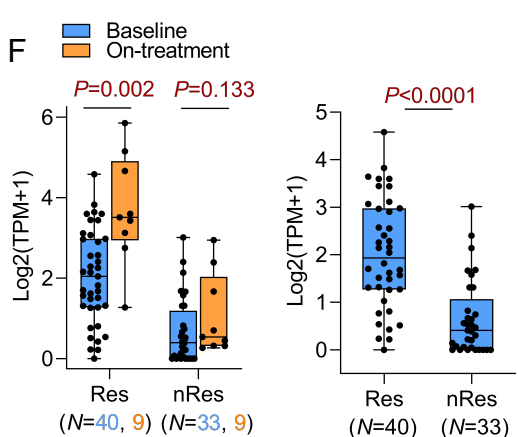

**Supplemental Figure 16. CXCR4 gene expression signature predict response to CTLA-4 checkpoint blockade in melanoma.**

RNASeq gene expression level (log2-transformed TPM with pseudocount 1) difference between responder and non-responder groups in metastatic melanoma patients. Individual gene expression changes between baseline and on treatment with anti-PD-1 or anti-CTLA-4 + anti-PD-1. Boxplots show differentially expressed CXCL12, CXCR4, CD1C, S100A12, CD8A, CD8B mRNA level from pooled data of patients responding (Res) and non-responding (nRes) to treatment (\* $p < 0.05$ , \*\* $p < 0.01$ , \*\*\* $p < 0.001$ , \*\*\*\* $p < 0.0001$ ) as determined using the limma-trend method. Data are presented as median and whiskers on the box plots extend minimum to maximum points. The top and bottom lines of the box plots represent the interquartile range (IQR), the mid line represents the median, and the whiskers on the box plots represent minimum and maximum values.

## Supplemental Methods

*CyTOF.* The CyTOF assay was performed according to the manufacturer's instructions. In brief,  $3 \times 10^6$  cells were stained with 5 mM Cell-ID cisplatin (Fludigm) for 5 minutes and quenched with MaxPar Cell Staining Buffer (Fludigm) using 5 times the volume of the cell suspension. After centrifugation, cell suspensions (50  $\mu$ l) were incubated with 5  $\mu$ L of human Fc-receptor Blocking solution for 10 minutes and 50  $\mu$ L of pre-mixed antibody cocktail for 30 minutes. After being washed, cells were incubated with 1 ml of cell intercalation solution 125 nM MaxPar Intercalator-Ir (Fludigm) into 1 ml MaxPar Fix and Perm Buffer (Fludigm) overnight at 4°C. Cells were centrifuged with MaxPar Water and pelleted. The pelleted cells were suspended with EQ Calibration Beads, and cell events were acquired by a Helios CyTOF mass cytometer. A summary of all mass cytometry reagents and antibodies, and their clone, source and catalogue #s used for analysis can be found in (Supplemental Table 2).

*Static cell adhesion assays.* Ligands (VCAM-1, ICAM-1, MAdCAM-1, fibronectin, fibrinogen, collagen I, and IV) in 50  $\mu$ L of 50 mM Tris-HCl (pH 7.4), 150 mM NaCl, TBS were added to wells of a 96-well plate and allowed to coat overnight at 4°C. To maximize the window to evaluate agonist activity, a sub-optimal coating concentration of ligand was used. This ligand concentration corresponded approximately to that which would yield  $\leq 5\%$  adhesion as determined by dose-response curves of ligand binding to the appropriate cell type. Unless otherwise stated in figure legends, the concentrations of ligands used for the assays were 0.5  $\mu$ g/mL VCAM-1, 5  $\mu$ g/mL ICAM-1, 1  $\mu$ g/mL MAdCAM-1, 1  $\mu$ g/mL fibronectin, 1  $\mu$ g/mL Collagen I, 0.3  $\mu$ g/mL Collagen IV, and 3  $\mu$ g/mL fibrinogen. All assays were performed as previously described(14). Briefly,  $2 \times 10^6$  cells were labeled for 30 minutes with calcein-AM (Thermo Fisher Scientific), washed, resuspended in binding buffer, and added to triplicate wells of ligand-coated

plates ( $2 \times 10^5$  cells/well) that had been blocked with 2% BSA. After a 30-minute incubation at 37°C, the plates were washed 3 times with binding buffer, the adherent cells were lysed, and fluorescence was measured on a Tecan Safire 2 plate reader (TECAN). Standard curves were run for each assay to convert fluorescence units directly to cell number.

*LIBS epitope analysis.* Jurkat cells were suspended in 100 $\mu$ L buffer (Tyrode's containing 1 mg/ml glucose and 1mM MgCl<sub>2</sub>, 1 mM CaCl<sub>2</sub>). Primary LIBS mAb B44, HUTS-21, or 9EG7 (10  $\mu$ g/ml) was added, and cells were incubated for 1 hour on ice. Vehicle, 10  $\mu$ M TBC3486, or 10 $\mu$ M 7HP349 was added at the same time as primary mAb. Cells were washed and resuspended in 50 $\mu$ L buffer containing FITC-conjugated GAM secondary antibody and were then incubated on ice for 30 minutes. After another 3 washes with buffer, cells were resuspended in 500 $\mu$ L buffer and were analyzed on a Beckman Coulter Epics XL-MCL (GMI). MFI was determined from 3 separate experiments, each performed on a different day.

*Cell spreading assays.* Human VCAM-1 (50  $\mu$ l of 4  $\mu$ g/ml) was coated in TBS overnight at 4°C onto 96-well plates (Costar). Plates were blocked with 2% BSA for 1 hour at room temperature and were washed with complete media (RPMI-1640 supplemented with 10% FBS, 100 units/ml penicillin, and 100  $\mu$ g/ml streptomycin). HSB cells ( $10^4$  cells in complete media) were mixed with vehicle or 10  $\mu$ M 7HP349 immediately prior to adding to the wells and incubated for the indicated time points at 37°C. Images of cells were captured at 10X magnification on an Olympus IX71 inverted microscope (Olympus America, Inc., Center Valley, PA) equipped with an AHHO39020 CCD camera. For each treatment group, images were analyzed in a blinded fashion using NIH ImageJ software (<https://imagej.nih.gov/ij/download.html>). Cells from triplicate wells (4 fields counted per well) were analyzed. A spreading index ( $((\text{perimeter}^2/4\pi)/\text{actual area})$ ) was calculated

for each cell in the field and the data presented as mean spreading index  $\pm$  standard deviation. Over 300 cells per data point were analyzed.

*Cell migration assays.* Migration assays were performed in 3  $\mu$ m pore size Transwells (24 well, Costar, Cambridge, MA). Membranes in the upper chambers were pre-coated with 10  $\mu$ g/ml VCAM-1 or 1  $\mu$ g/ml ICAM-1 in 50  $\mu$ L TBS overnight at 4°C and were then blocked with 2% BSA for 1 hour at room temperature. After washing with migration medium (RPMI-1640 supplemented with 1% FBS, 100 Units/ml penicillin and 100  $\mu$ g/ml streptomycin), upper chambers were loaded with  $2 \times 10^5$  Jurkat cells (VCAM-1) or Jurkat ( $\alpha$ 4-) cells (ICAM-1) in 160  $\mu$ L of migration medium. Lower chambers contained 600  $\mu$ L of migration medium supplemented with either 5 ng/ml (VCAM-1) or 1 ng/mL (ICAM-1) CXCL12 to induce chemotaxis. Cells were mixed with vehicle (1% DMSO) or 7HP349 at the indicated concentrations immediately prior to being added to the upper chamber. After a 4-hour incubation at 37°C, 5% CO<sub>2</sub>, the upper chambers were removed, and cells in the lower chamber were collected and counted on a hemocytometer. The mean number of cells migrated in the absence of CXCL12 across VCAM-1 and ICAM-1 coated filters was 0.5 and 15 cells, respectively. These background values were subtracted from each group.

*Purified  $\alpha$ 4 $\beta$ 1 binding assays.* Purified human  $\alpha$ 4 $\beta$ 1 was immobilized (10  $\mu$ g/ml) on 96-well plates in TBS (overnight at 4°C). BSA-CS-1 (400  $\mu$ g/ml) was adsorbed onto fluorescent microspheres (3  $\mu$ m YG beads, polysciences) also in TBS (overnight at 4°C). Both were blocked with BSA. After washing, CS-1 bound microspheres were incubated with immobilized  $\alpha$ 4 $\beta$ 1 in the presence or absence of 7HP349 (10  $\mu$ M) for 2h, RT. Unbound beads were washed away, and  $\alpha$ 4 $\beta$ 1 bound beads were measured in a fluorescent plate reader. Function blocking mAb (HP2/1) or control IgG was used at concentrations of 10  $\mu$ g/ml.



*Proliferation and IL-2 production.* Purified T cells ( $1 \times 10^5$ /well) were plated in 96 well plates coated with mAb OKT3 (5 ng/well) or ICAM-1 (200 ng/well) and incubated for 2-3d in complete media at 37°C 5% CO<sub>2</sub> in the presence or absence of indicated concentrations of 7HP349. Proliferation was measured via standard MTT assays. Soluble IL-2 was collected and measured via ELISA assay. Function blocking antibodies or IgG control were added at the onset of culture (10 µg/ml).

*Killing assay.* Effector T cells (TIL) from HLA-A0201+ patients derived melanoma cell lines were incubated with HLA-matched target tumor cell line # 2767 labeled with eFluor670 at the effector-to-target ratio (E:T) of 0:1 and 1:2 and 7HP349 dose concentrations 0.01µM, 0.1µM, 1µ and 10µM for 3 hours. The cells were fixed after 3 hours incubation and permeabilized using BD Cytotfix/Cytoperm, according to the manufacturer's protocol, stained with anti-cleaved caspase-3, and analyzed by LSR Fortessa X-20.

*Molecular Dynamics Simulations.* The  $\alpha 4\beta 1$  model is based on the  $\alpha 4\beta 7$  and  $\alpha 5\beta 1$  crystal structures (entries 3V4V and 3VI4, respectively) as reported previously (35). 7HP349 was initially expanded into its 3D minimized structure using BALLOON 1.6.6 and then processed with PRODRG to build topology input files. Both  $\alpha 4\beta 1$  and the ligand 7HP349 were prepared for docking analysis using AUTODOCK TOOLS and AUTODOCK\_VINA 1.1.2. Docking was completed with exhaustiveness set to 100 and the top 20 poses evaluated. Molecular dynamics simulations were run using GROMACS with a GROMOS96 43a1 force field. The total system charge is neutralized using the appropriate number of sodium or chloride counter ions. An energy minimization is first performed to remove interatomic clashes using 500 steps of the steepest descent algorithm or until a threshold is met. Next, NVT and NPT minimization was done to prepare the complex for equilibration and production MD simulation. Trajectories for the best 3 poses were simulated for 5 nano-seconds and concatenated for analysis.

*Static cell adhesion assays with CXCL12 and Pertussis Toxin.* Assays testing the effect of pertussis toxin (PTX) were performed as described above using Jurkat cells and TBS with 1mM MgCl<sub>2</sub>, 50% FBS. A peptide-BSA conjugate containing the connecting segment-1 (CS1) sequence of fibronectin was used as substrate (36). The concentration of CS1 used had been previously determined to be optimal for the given mediator (1 µg/mL and 5 µg/mL for 7HP349 and CXCL12, respectively). Cells were incubated with PTX at 100 ng/mL for 1.5 h prior to calcein-AM labeling. 7HP349 (30 µM) or CXCL12 (100 ng/mL) were added to the cells just prior to adding to the wells of the assay plate.

*TCGA analysis.* The melanoma immunotherapy cohort RNASeq data was obtained from the European Nucleotide Archive (ENA, PRJEB23709) [Pubmed: 30753825]. The raw data were quality checked with FastQC, and then mapped to human genome hg38 and transcriptome GENCODEV23 using HiSat2 [PMID: 25751142]. The gene expression level was calculated using StringTie [PMID: 25690850]. The differential expression analysis was performed between responder (CR+PR) and non-responder (PD+SD) groups using limma-trend [PMID: 24485249]. Cutoffs were set to  $|\log FC| > 0.585$ , and p-value  $< 0.05$ .

Supplemental Table 1 . Immune cell frequencies were compared between the indicated treatments.

| pDC<br>cDC1<br>cDC2<br>IM<br>M1Φ | IgG<br>vs<br>anti-VCAM-1 | Anti-ICAM-1<br>vs<br>anti-VCAM-1 | IgG<br>vs<br>anti-VCAM-1 | Anti-ICAM-1<br>vs<br>anti-VCAM-1 |
|----------------------------------|--------------------------|----------------------------------|--------------------------|----------------------------------|
|                                  | Vehicle                  |                                  | 7HP349                   |                                  |
|                                  | P-value                  | P-value                          | P-value                  | P-value                          |
|                                  | 0.22939                  | 0.48048                          | 0.01998                  | 0.00613                          |
|                                  | 0.11219                  | 0.08171                          | 0.49691                  | 0.07201                          |
|                                  | 0.89032                  | 0.46829                          | 0.00496                  | 0.00079                          |
|                                  | 0.13143                  | 0.51009                          | 0.31898                  | 0.01927                          |
|                                  | 0.03353                  | 0.91938                          | 0.68016                  | 0.02268                          |

Mice bearing 3-day s.c. B16.BL6 melanomas received GVAX intradermally (i.d.) and anti-CTLA-4 (i.p.) at days 3, 6, and 9 and vehicle or 7HP349 at days 3, 4, 5, 6, and 7, and IgG, anti-VCAM-1, or anti-ICAM-1 treatment at days 3, 5, 7, 9 and 11.

<sup>1</sup>Immune cell frequencies were compared between dendritic cells, inflammatory monocytes and M1 macrophages after mice were treated with indicated treatments.

**Supplemental Table 2.**

**Sources and catalog numbers for experimental animal, cell lines, flow cytometer and CyTOF antibodies, therapeutic antibodies, reagents and recombinant proteins.**

| REAGENT or RESOURCE                           | SOURCE                      | Cat No.                                                    |
|-----------------------------------------------|-----------------------------|------------------------------------------------------------|
| <b>Experimental models: Organisms/strains</b> |                             |                                                            |
| Mouse: C57BL/6                                | Charles River               | 027                                                        |
| Mouse: Balb/c                                 | Charles River               | 028                                                        |
| <b>Experimental models: Cell lines</b>        |                             |                                                            |
| B16.BL6                                       | A gift from P.M. Sharma     | University of Texas MD Anderson Cancer Center, Houston, TX |
| B16-GM-CSF                                    | A gift from P.M. Sharma     | University of Texas MD Anderson Cancer Center, Houston, TX |
| CT26                                          | ATCC                        | Cat# CRL-2638                                              |
| E.G7-OVA                                      | ATCC                        | Cat# CRL-2113                                              |
| LLC                                           | A gift from Dr. M.A. Cortez | University of Texas MD Anderson Cancer Center, Houston, TX |
| Jurkat cell line                              | ATCC                        | TIB-152                                                    |
| Jurkat cell line (K562)                       | ATCC                        | CCL-243                                                    |
| Jurkat cell line (HSB-2)                      | ATCC                        | CLL-120.1                                                  |
| Jurkat cell lines (RBL-1)                     | ATCC                        | CRL-1378                                                   |
| Jurkat cell lines (70Z/3)                     | ATCC                        | TIB-158                                                    |
| Jurkat cell lines (DH82)                      | ATCC                        | CRL-10389                                                  |
| <b>Antibodies</b>                             |                             |                                                            |
| Anti-mouse Ly-6C (clone HK1.4)                | BioLegend                   | 128002                                                     |
| Anti-mouse CD4 (clone RM4-5)                  | BioLegend                   | 100506                                                     |
| Anti-mouse CD11b (clone M1/70)                | BioLegend                   | 101249                                                     |
| Anti-mouse Ly-6G (clone 1A8)                  | DVS-Fluidigm                | 3141008B                                                   |
| Anti-mouse CD11c (clone N418)                 | DVS-Fluidigm                | 3142003B                                                   |
| Anti-mouse CD183 (clone CXCR3-173)            | BioLegend                   | 126502                                                     |
| Anti-mouse IL-2 (clone JES6-5H4)              | DVS-Fluidigm                | 3144002B                                                   |
| Anti-mouse CD69 (clone H1.2F3)                | DVS-Fluidigm                | 3145005B                                                   |
| Anti-mouse CD8a (clone 53-6.7)                | BioLegend                   | 100702                                                     |
| Anti-mouse CD223, LAG-3 (C9B7W)               | BioLegend                   | 125202                                                     |
| Anti-mouse CD19 (clone 4D5)                   | BioLegend                   | 115502                                                     |
| Anti-mouse CD25 (clone 3C7)                   | DVS-Fluidigm                | 3150002B                                                   |
| Anti-mouse p-Stat3 (Tyr705) (clone M9C6)      | Cell Signaling Tech.        | 4113S                                                      |
| Anti-mouse CD49d (clone MFR4.B)               | BioLegend                   | 103701                                                     |
| Anti-mouse CD274, PD-L1 (clone 10F.9G2)       | BioLegend                   | 124337                                                     |
| Anti-mouse CD272, BTLA (clone 6F7)            | DVS-Fluidigm                | 3156028B                                                   |
| Anti-mouse Foxp3 (clone FJK-16s)              | DVS-Fluidigm                | 3158003A                                                   |
| Anti-mouse F4/80 (clone BM8)                  | DVS-Fluidigm                | 3159009B                                                   |

|                                                    |                      |             |
|----------------------------------------------------|----------------------|-------------|
| Anti-mouse CD44 (clone IM7)                        | BioLegend            | 103002      |
| Anti-mouse T-bet (clone 4B10)                      | DVS-Fluidigm         | 3161014B    |
| Anti-mouse Bax (clone 5B7)                         | BioLegend            | 633702      |
| Anti-mouse CD62L (clone MEL-14)                    | DVS-Fluidigm         | 3164003B    |
| Anti-mouse IFN $\gamma$ (clone XMG1.2)             | DVS-Fluidigm         | 3165003B    |
| Anti-mouse Bcl-2 (clone BCL/10C4)                  | BioLegend            | 633502      |
| Anti-mouse IL-6 (clone MP5-20F3)                   | DVS-Fluidigm         | 3167003B    |
| Anti-mouse ROR $\gamma$ t (clone 600214)           | DVS-Fluidigm         | 3168018B    |
| Anti-mouse p-Jak2 (clone C80C3)                    | Cell Signaling Tech. | 3776        |
| Anti-mouse CD49b, Integrin $\alpha$ 2 (clone HMa2) | DVS-Fluidigm         | 3170008B    |
| Anti-mouse CD279, PD-1 (clone 29F.1A12)            | BioLegend            | 135202      |
| Anti-mouse Ki67 (clone B56)                        | DVS-Fluidigm         | 3172024B    |
| Anti-mouse Granzyme B (clone GB11)                 | DVS-Fluidigm         | 3173006B    |
| Anti-mouse IL-17A (clone TC11-18H10.1)             | BioLegend            | 506935      |
| Anti-mouse CD127, IL-7Ra (clone A7R34)             | DVS-Fluidigm         | 135029      |
| Anti-mouse CD278, ICOS (clone 7E.17G9)             | eBioscience          | 14-9942-85  |
| Anti-mouse I-A/I-E, MHC-II (clone M5/114.15.2)     | DVS-Fluidigm         | 3209006B    |
| Anti-mouse CD278, ICOS (clone C398.4A)             | Biolegend            | 313502      |
| Anti-mouse CD357, GITR (clone DTA1)                | DVS-Fluidigm         | 3143019B    |
| Anti-mouse GATA3 (clone TWAJ)                      | eBioscience          | 14-9966-82  |
| Anti-mouse Ly-6G (clone 1A8)                       | Biolegend            | 127637      |
| Anti-mouse CXCR2 (clone SA044G4)                   | Biolegend            | 149302      |
| Anti-mouse CD197, CCR7 (clone SA044G4)             | eBioscience          | 16-1971-85  |
| Anti-mouse CD69 (clone H1.2F3)                     | Biolegend            | 104533      |
| Anti-mouse CD357, GITR (clone CXNFT)               | DVS-Fluidigm         | 3161011B    |
| Anti-mouse TNFa (clone MP6-XT22)                   | DVS-Fluidigm         | 3162002B    |
| Anti-mouse Ki67 (clone B56)                        | BD Biosciences       | 556003      |
| Anti-mouse CD206, MMR (clone C068C2)               | DVS-Fluidigm         | 3169021B    |
| Anti-mouse CD127, IL-7Ra (clone A7R34)             | Biolegend            | 135029      |
| Anti-mouse B220, CD45R (clone RA3-6B2)             | Biolegend            | 103202      |
| Rat IgG1 isotype (clone HPRN)                      | BioXcell             | BE0088      |
| Anti-mouse CD11a-PE (clone M17/4)                  | eBioscience          | 12-0111-82  |
| Anti-mouse TNFa□BV650□□clone MP6-XT22)             | BD Biosciences       | 563943      |
| Anti-mouse CD11c-PE-Cy7 (clone N418)               | Biolegend            | 117318      |
| Anti-mouse CD11c-BV421 (clone N418)                | Biolegend            | 117329      |
| Anti-mouse CD11b-AF700 (clone M1/70)               | eBiosciences         | 56-0112-82  |
| Anti-mouse Ly6G-BUV395 (clone 1A8)                 | BD Biosciences       | 563978      |
| Anti-mouse CD19-PE Cy5 (clone MB19-1)              | Biolegend            | 115510      |
| Anti-mouse granzyme B-FITC (clone NGZB)            | eBiosciences         | 11-8898-809 |
| Anti-mouse granzyme B-Efluor 660 (clone NGZB)      | eBioscience          | 50-8898-82  |
| Anti-mouse CCR7-PE Cy7 (clone 4B12)                | Biolegend            | 120124      |
| Anti-mouse CCR6-BV605 (clone 29-2L17)              | Biolegend            | 129819      |
| Anti-mouse Foxp3-APC (clone FJK-16s)               | Invitrogen           | 17-5773-82  |
| Anti-mouse Ki-67-PE Cy7 (clone 16A8)               | Biolegend            | 652426      |
| Anti-mouse Ki-67-PE (clone 16A8)                   | Biolegend            | 652403      |
| Anti-mouse CD45-BV421 (clone 30-F11)               | Biolegend            | 103133      |
| Anti-mouse CD45-APC Cy7 (clone 30-F11)             | Biolegend            | 103116      |
| Anti-mouse CD45-AF700 (clone 30-F11)               | Biolegend            | 103128      |

|                                                   |                          |            |
|---------------------------------------------------|--------------------------|------------|
| Anti-mouse CD44-FITC (clone IM7)                  | Biologend                | 103022     |
| Anti-mouse CD44-PE-Cy7 (clone IM7)                | Biologend                | 103029     |
| Anti-mouse CD4-BV785 (clone GK1.5)                | Biologend                | 100453     |
| Anti-mouse F4/80-APC (clone BM8)                  | Biologend                | 123116     |
| Anti-mouse F4/80-BV421 (clone BM8)                | Biologend                | 123132     |
| Anti-mouse PD-L1-PE Cy7 (clone 10F.9G2)           | Biologend                | 124314     |
| Anti-mouse Bcl-2-Alexa Fluor 647 (clone BCL/10C4) | Biologend                | 633510     |
| Anti-mouse Lag3-BV650 (clone C9B7W)               | Biologend                | 125227     |
| Anti-mouse PD-1-APC Cy7 (clone 29F.1A12)          | Biologend                | 135224     |
| Anti-mouse Tim-3-PE (clone B8.2C12)               | Biologend                | 134003     |
| Anti-mouse ICOS-FITC (clone C398.4A)              | Biologend                | 313506     |
| Anti-mouse CXCR3-APC (clone CXCR3-173)            | Biologend                | 126511     |
| Anti-mouse Ly6c-BV605 (clone AL-21)               | BD Biosciences           | 563011     |
| Anti-mouse Ly6c-APC (clone AL-21)                 | BD Biosciences           | 560595     |
| Anti-mouse CD25-FITC (clone 3C7)                  | Biologend                | 102005     |
| Anti-mouse Pstat3-Percp-Cy5.5 (clone 4/P-Stat3)   | BD Biosciences           | 560114     |
| Anti-mouse IL-17A-APC Cy7 (clone TC11-18H10.1)    | Biologend                | 506940     |
| Anti-mouse T-bet-BV421 (clone 4B10)               | Biologend                | 644815     |
| Anti-mouse T-bet-PE (clone 4B10)                  | BD Biosciences           | 561265     |
| Anti-mouse CD206-AF647 (clone C068C2)             | Biologend                | 141712     |
| Anti-mouse CD103-PE (clone 2E7)                   | eBioscience              | 12-1031-81 |
| Anti-mouse CCR2-BV510 (clone SA203G11)            | Biologend                | 150617     |
| Anti-mouse CXCL9-AF 647 (clone MIG-2F5.5)         | Biologend                | 515606     |
| Anti-mouse CCL5-PE (clone 2E9/CCL5)               | Biologend                | 149104     |
| Anti-mouse CCL20-AF 700 (clone 114906)            | R&D                      | IC760N     |
| Anti-mouse RORgt-BV650 (clone Q31-378)            | Fisher Scientific        | BDB564722  |
| Anti-mouse CD8 - BV711 (clone 53-6.7)             | Biologend                | 100747     |
| Anti-mouse CTLA-4 mouse IgG (clone 9H10)          | Bioxcell                 | BP0131     |
| Anti-mouse PD-1 mouse IgG2A,K (clone RMP1-14)     | Bioxcell                 | BP0146     |
| Anti-mouse CD8 (clone clone 53-6.7)               | Bioxcell                 | BE0004-1   |
| Anti-mouse NK1.1 (clone PK136)                    | Bioxcell                 | BP0036     |
| Anti-mouse ICAM-1 (clone YN1/1.7.4)               | Bioxcell                 | BE0020-1   |
| Anti-mouse VCAM-1 (clone M/K-2.7)                 | Bioxcell                 | BE0027     |
| Anti-mouse Ly6G (clone 1A8)                       | Bioxcell                 | BE0075-1   |
| Anti-mouse CXCL12 (clone 79014)                   | Bioxcell                 | MAB310-500 |
| Mouse IgG isotype (clone N/A)                     | Bioxcell                 | BE0087     |
| Rat IgG2a, $\kappa$ isotype (clone RMP1-14)       | Bioxcell                 | BP0146     |
| Rat IgG1 isotype (clone HPRN)                     | Bioxcell                 | BE0088     |
| Anti-human $\alpha$ 4 (clone HP2/1)               | Bio-Rad                  | MCA697     |
| Anti-human $\alpha$ L (clone 38)                  | Bio-Rad                  | MCA1848    |
| Anti-human b1 (clone P5D2)                        | R&D Systems              | MAB17781   |
| Anti-human ICAM-1 (clone BBIG-I1)                 | R&D Systems              | BBA3       |
| Anti-human $\alpha$ 5 (clone SAM-1)               | Thermo Fisher Scientific | 14-0496-82 |
| Anti-human MAdCAM-1 (clone MECA-367)              | Thermo Fisher Scientific | 16-5997-85 |
| Anti-human b7 (clone FIB27)                       | BD Biosciences           | 553812,    |
| Anti-human b1 (clone HUTS-21)                     | BD Biosciences           | 556047     |
| Anti-human b1 (clone 9EG7)                        | BD Biosciences           | 553715     |

|                                                      |                                  |                                                                                                           |
|------------------------------------------------------|----------------------------------|-----------------------------------------------------------------------------------------------------------|
| Anti-human a4 (clone L25)                            | BD Biosciences                   | 747299,                                                                                                   |
| Anti-human b1 (clone B44)                            | Millipore                        | MAB2259Z,                                                                                                 |
| Anti-human b2 (clone MEM-48)                         | AbCAM                            | AB657,                                                                                                    |
| Donkey anti-goat polyclonal                          | Thermo Fischer Scientific        | A-21447                                                                                                   |
| Anti-human b1 (clone 33B6)                           | A gift from Dr. Bradley McIntyre | University of Texas MD Anderson Cancer Center, Houston, TX                                                |
| <b>Chemicals, peptides, and recombinant proteins</b> |                                  |                                                                                                           |
| Human collagen type I                                | Sigma-Aldrich                    | CC050                                                                                                     |
| Human collagen type IV                               | Sigma-Aldrich                    | CC076                                                                                                     |
| Fibronectin                                          | Sigma-Aldrich                    | F2006                                                                                                     |
| Fibrinogen                                           | Sigma-Aldrich                    | 341576                                                                                                    |
| Human VCAM-1                                         | R&D Systems                      | ADP5-200                                                                                                  |
| Human ICAM-1                                         | R&D Systems                      | ADP4-200                                                                                                  |
| Human MAdCAM-1                                       | R&D Systems                      | 6056-MC-050                                                                                               |
| Human CXCL12                                         | R&D Systems                      | 350-NS-050                                                                                                |
| Mouse VCAM-1                                         | R&D Systems                      | 643-VM-200                                                                                                |
| Cell-ID Intercalator-Ir                              | Fludigm                          | 201192A                                                                                                   |
| Cell-ID™ Cisplatin                                   | Fludigm                          | 201064                                                                                                    |
| RPMI 1640                                            | Corning                          | 10-040-CV                                                                                                 |
| Penicillin Streptomycin                              | Corning                          | 30-002-CI                                                                                                 |
| 0.05% Trypsin, 0.53nM EDTA                           | Thermo Fisher                    | 25-052-CI                                                                                                 |
| Histopaque                                           | Sigma-Aldrich                    | 11191                                                                                                     |
| Phosphate Buffered Saline                            | Corning                          | 21-040-CV                                                                                                 |
| ACK Lysing Buffer                                    | Gibco                            | A10492-01                                                                                                 |
| Fetal Bovine Serum                                   | Gemni Bio-Products               | 110-106                                                                                                   |
| Tyramide Signal Amplification                        | Fortis Life Science              | <a href="http://www.fortislifescience.com">www.fortislifescience.com</a>                                  |
| Foxp3/ Transcription factor staining buffer set      | eBioscience                      | 00-5523-00                                                                                                |
| AllPrep® DNA/RNA Kit                                 | Qiagen                           | 80284                                                                                                     |
| Mouse SDF-1 alpha / CXCL12 alpha ELISA kit           | Sigma-Aldrich                    | RAB0125-1KT                                                                                               |
| MACS Pan T cell Isolation Kit                        | Miltenyi Biotec                  | 130-096-535                                                                                               |
| Calcein-AM                                           | Thermo Fisher                    | C1430                                                                                                     |
| Maxpar Fix and perm buffer                           | Fludigm                          | 201067                                                                                                    |
| H-2Kb – KSPWFTTL peptide                             | Peptide International            | <a href="https://www.bio-connect.nl/supplier/vivitide/">https://www.bio-connect.nl/supplier/vivitide/</a> |
| H-2Kb – SVYDFVWL peptide                             | Peptide International            | <a href="https://www.bio-connect.nl/supplier/vivitide/">https://www.bio-connect.nl/supplier/vivitide/</a> |
| H-2D <sup>b</sup> – KVPRNQDWL peptide                | CPC scientific                   | <a href="https://cpcscientific.com/">https://cpcscientific.com/</a>                                       |
